# Supplementary material
Source: HighWire-hosted journal article supplement (https://erj.ersjournals.com/content/49/1/1601090)
Supplement: inline-supplementary-material-1 [file inline-supplementary-material-1.pdf]

# International ERS guidelines for the diagnosis of PCD

## Supplementary File

### Methods

#### Task Force and Work Group Composition

The membership and roles of the Task Force panel are summarised in Supplementary Table 1. Jane Lucas and Angelo Barbato (Chairs) were responsible for the governance and integrity of the work conducted in this TF. A leadership group of four (Jane Lucas, Claudia Kuehni, Angelo Barbato, Andy Bush) were responsible for chairing meetings, providing support to the work groups and monitoring progress. This leadership group also coordinated the writing of the practice guideline and oversaw the editing. Work Groups (WG) leaders were proposed and agreed at the first meeting of the task force, based on their expertise. Following training from ERS methodologists in GRADE, systematic reviewers drafted protocols for the searches, conducted systematic reviews, extracted data from the chosen manuscripts, assessed the quality of the data and finally synthesised the data using narrative and if appropriate meta-analysis.

The TF panel comprised experts and trainees in the field of PCD from multidisciplinary backgrounds including pulmonologists, ENT, cell scientists, electron microscopists and geneticists. Their expertise included clinical phenotyping, screening tests including nasal nitric oxide (nNO), ex-vivo and in-vivo ciliary function tests including high-speed video microscopy analysis (HSVA) and radioaerosol mucociliary clearance [1], transmission electron microscopy (TEM), cell culture (submerged [2] and at air-liquid interface- ALI[3]), lung physiology and imaging [4–7], epidemiology[8] and qualitative research[9]. Some members of the panel lead national diagnostic centres, and there were members from countries where diagnostic facilities are limited. Members of the panel volunteered to participate in WG activities based on their expertise and interests. The ERS provided support to the panel from two methodologists, an advisor for dissemination and a junior committee member; the methodologists did not participate in the votes of the recommendations, the dissemination advisor and junior committee member were paediatric pulmonologists and did contribute to WG activities, panel discussions and voting.

A larger group with interest in PCD has met annually at ERS Congresses since 2006. The opinions of this group of over 60 clinicians, nurses, scientists and allied health professionals were sought and taken into account when deciding which tests to evaluate and which questions needed answering by the TF.

Two patient representatives (Beatrice Redfern and Bernhard Rindlisbacher) participated in the first task force meeting, helped in the project design, contributed to the writing of the practice guideline and the dissemination of the report. The European Lung Foundation contributed to the first meeting. An international survey and semi-structured interviews were conducted by Laura Behan to understand the patient perspective [10]

**Supplementary Table 1: Task force and Work group composition, presented in alphabetical order.**

Membership of TF panel for duration unless dates provided. \*\* contributed to the work but not members of the task force panel. Additionally, David Rigau and Thomy Tonia are ERS methodologists who supported the project.

| Task Force member                  | Speciality/ expertise                                                       | Role/ (Work Group membership)                                                                      |
|------------------------------------|-----------------------------------------------------------------------------|----------------------------------------------------------------------------------------------------|
| <b>Barbato</b> , Angelo (Italy)    | Paediatric pulmonology and PCD                                              | Co-chair, leadership team (genetics and IF)                                                        |
| <b>Behan</b> , Laura (UK/Ire)      | Social scientist, PhD candidate.                                            | Investigated patient perspective                                                                   |
| <b>Bush</b> , Andy (UK)            | Paediatric pulmonology. PCD diagnostics. Clinical & translational research. | Leadership team.                                                                                   |
| <b>Caudri</b> , Daan (Netherlands) | Paediatric pulmonology. Epidemiologist.                                     | Junior Member Guidelines Working Group of ERS (clinical features, nNO), second data extraction nNO |
| <b>Collins</b> , Samuel (UK)       | Clinical PhD candidate: Paediatric pulmonology.                             | Systematic reviewer: (HSV, genetics). Writing team. Internal communications.                       |
| <b>**Dell</b> , Sharon (Canada)    | Paediatric pulmonology. PCD. Epidemiology.                                  | Second data extraction clinical features WG                                                        |

|                                    |                                                                                                                         |                                                                                            |
|------------------------------------|-------------------------------------------------------------------------------------------------------------------------|--------------------------------------------------------------------------------------------|
| <b>Eber</b> , Ernst (Austria)      | Paediatric Pulmonology                                                                                                  | Dissemination (clinical features, nNO)                                                     |
| <b>Escudier</b> , Estelle (France) | Paediatrician, Diagnostic scientist, PCD diagnostics with HSV and EM                                                    | (TEM) 2015-16                                                                              |
| <b>Goutaki</b> , Myrofora (CH)     | Clinical PhD candidate: Paediatric pulmonology. Epidemiology.                                                           | Systematic reviewer: (clinical features)                                                   |
| <b>Hogg</b> , Claire (UK)          | PCD Diagnostics. Paediatric pulmonology.                                                                                | (clinical features, genetics)                                                              |
| <b>Jorissen</b> , Mark (Belgium)   | ENT. PCD diagnostics with expertise in cell culture                                                                     | (HSV, TEM)                                                                                 |
| <b>Kennedy</b> , Marcus (Ire)      | Adult pulmonologist. Previously working in USA (genetics and EM), now Ireland (no specialist PCD diagnostic facilities) | (genetics, TEM) 2014-15                                                                    |
| <b>Kuehni</b> , Claudia(CH)        | Paediatric pulmonologist. Epidemiologist.                                                                               | Leadership team; WG leader: (clinical features)                                            |
| <b>Latzin</b> , Philipp (CH)       | Paediatric pulmonologist, Respiratory physiology                                                                        | (clinical features)                                                                        |
| <b>Legendre</b> , Marie (France)   | Clinical molecular geneticist, PCD diagnostics, genetics.                                                               | (genetics) 2015-16                                                                         |
| <b>Leigh</b> , Margaret (USA)      | Paediatric Pulmonology, Diagnostics, EM, genetics. American perspective                                                 | (HSV, genetics)                                                                            |
| <b>Lucas</b> , Jane S (UK),        | PCD Diagnostics. Paediatric pulmonology.                                                                                | Chair of Task Force, leadership team, WG leader nNO (clinical features, nNO, HSV, IF, TEM) |
| <b>Midulla</b> , Fabio (It)        | Paediatric Pulmonologist                                                                                                | (clinical features, nNO)                                                                   |
| <b>Nielsen</b> , Kim G (DK)        | PCD Diagnostics. Paediatric pulmonology.                                                                                | (nNO)                                                                                      |
| <b>Hirst</b> , Rob (UK)            | Diagnostic scientist with expertise in cell culture                                                                     | (high speed video, TEM, genetics)                                                          |

|                                       |                                                                |                                                      |
|---------------------------------------|----------------------------------------------------------------|------------------------------------------------------|
|                                       |                                                                |                                                      |
| <b>Omran</b> , Heymut (DE)            | PCD Diagnostics. Paediatric pulmonology.                       | WG leader: Genetics (IF)                             |
| <b>Papon</b> , Jean-Francois (France) | ENT. PCD diagnostics.                                          | WG leader: HSV                                       |
| <b>Pohunek</b> , Petr (CZ)            | Paediatric pulmonology.                                        | (clinical features)                                  |
| <b>Redfern</b> , Beatrice (UK)        | Patient representative                                         |                                                      |
| <b>Rindlisbacher</b> , Bernhard (CH)  | Patient representative                                         |                                                      |
| <b>Santamaria</b> , Francesca (Italy) | Paediatric pulmonology. PCD diagnostics                        | (nNO)                                                |
| <b>Shoemark</b> , Amelia (UK)         | PCD scientist, clinical scientist in ultrastructural pathology | Work group leader: TEM<br>Second extractor TEM<br>IF |
| <b>Snijders</b> , Deborah (Italy)     | Paediatric pulmonology.                                        | Systematic reviewer: IF and genetics                 |
| <b>**Titieni</b> , A (Germany)        | Junior scientist in PCD/ Resident in Pediatrics                | Second extractor IF                                  |
| <b>Walker</b> , Woolf (UK)            | Paediatric pulmonology.                                        | Systematic reviewer: TEM 2014-16                     |
| <b>Werner</b> , Claudius (Germany)    | Paediatric pulmonology.                                        | Work group leader IF 2014-16                         |

## Disclosure of Conflicts of Interest

Panel members disclosed potential conflicts of interest according to ERS policies at the start of the Task Force and prior to publication of this manuscript. Following review of these statements, the Chairs (Lucas, Barbato) and ERS Guidelines committee considered it unnecessary for any panel member to abstain from decisions for any of the recommendations.

The ERS provided meeting facilities during their annual conference for meeting of the whole committee in 2014 and 2015. Meeting rooms in Lausanne were provided by ERS in January 2015 for training of a core group to undertake the literature searches and evaluation. The views and interests of ERS had no influence on the final recommendations.

## Patient important outcomes

The GRADE approach emphasizes the importance of recommendations based on the impact on patient-important outcomes. GRADE methodology is usually used to assess quality of evidence for therapeutic interventions, where important outcomes might include improvement in quality of life, mortality etc. Such outcomes are not directly assessed in diagnostic studies and we therefore used diagnostic accuracy as a surrogate measure. An accurate diagnosis was endorsed as an important outcome by the patient representatives to the Task Force, as well as responses to a survey of 352 patients (25 countries, 9 European languages), and 20 in-depth interviews. Patients were particularly frustrated by delayed referrals often due to poor knowledge of general practitioners about PCD. They were happy to travel for assessment to specialist units, valuing the opportunity for staff with expertise to conduct specialist tests.

## Formulation of the Topics and Questions

The panel met with a wider group of professionals (n=80) interested in PCD during ERS Congress 2014. A semi-structured discussion led to understanding of current diagnostic pathways and tests across Europe, and the questions that clinicians and scientists need answering. These discussions informed a closed meeting of the TF panel. The panel agreed that six diagnostic tests (clinical symptoms, nasal nitric oxide- nNO, high speed video-microscopy- HSV, transmission electron microscopy- TEM, genotype and immunofluorescence labelling of ciliary proteins-IF) would be evaluated using a 'PICO' structured question: "Patients suspected of having PCD, Investigated by

nNO, TEM etc, when **C**omparing patients with a final positive or negative diagnostic outcome, what was the diagnostic accuracy (**O**utcome) of the test?" We primarily aimed to identify studies of consecutive patients referred for PCD testing, in whom the PCD diagnosis was either confirmed or excluded. In the absence of sufficient literature of this study design, it was agreed that the comparator group might include healthy controls, or patients with other respiratory diseases (e.g. CF, asthma) from case control studies, but this would down grade the level of evidence. Lack of a gold standard diagnostic test for PCD was a limitation for this project. Diagnostic performance indicators (e.g. sensitivity and specificity) were therefore compared to the authors' final decision regarding positive/ negative diagnosis based on available tests. The PICO questions were refined during teleconferences and email discussions (supplementary table 2).

Several less structured questions were agreed to provide the basis of a narrative synthesis, but these questions were not used to provide recommendations.

|                                    | <b>Clinical features</b>                                                                                                                                                                                                                                                                                                                   | <b>High speed video microscopy</b>                                                                               | <b>Nasal nitric oxide</b>                                                                                    | <b>Genetics</b>                                                                                          | <b>Immunofluorescence</b>                                                                                                        | <b>Electron microscopy</b>                                                                                                                                      |
|------------------------------------|--------------------------------------------------------------------------------------------------------------------------------------------------------------------------------------------------------------------------------------------------------------------------------------------------------------------------------------------|------------------------------------------------------------------------------------------------------------------|--------------------------------------------------------------------------------------------------------------|----------------------------------------------------------------------------------------------------------|----------------------------------------------------------------------------------------------------------------------------------|-----------------------------------------------------------------------------------------------------------------------------------------------------------------|
| Work Package Question <sup>1</sup> | <p>In patients suspected of having PCD, which clinical features (symptoms, signs, measurements) are associated with a diagnosis of PCD?</p> <p>Findings will help clinicians to define the group of patients, who should be referred for:</p> <p>a) PCD screening (with nNO);</p> <p>b) PCD confirmatory tests, even if nNO is normal?</p> | In patients suspected of having PCD, should ex-vivo assessment of ciliary function be used as a diagnostic test? | In patients suspected of having PCD, should nasal NO measurement be used as a diagnostic tool <sup>6</sup> ? | In patients suspected of having PCD, should genetic analysis be used as a diagnostic test <sup>6</sup> ? | In patients suspected of having PCD, should immunofluorescence analysis of protein mislocalisation be used as a diagnostic test? | In patients suspected of having PCD, should assessment of ciliary structure with transmission electron microscopy <sup>10</sup> , be used as a diagnostic test? |
| Patient group                      | Patients suspected of having PCD                                                                                                                                                                                                                                                                                                           | Patients suspected of having PCD                                                                                 | Patients with clinical suspicion of a                                                                        | Patients with clinical suspicion of a                                                                    | Patients with clinical suspicion of a diagnosis of PCD                                                                           | Patients with clinical suspicion of a                                                                                                                           |

|                  |                                                                                                                                                                                                                                                                                                                                  |                                                                                                 |                                                                                                         |                                                                                               |                                                                                               |                                                                                                  |
|------------------|----------------------------------------------------------------------------------------------------------------------------------------------------------------------------------------------------------------------------------------------------------------------------------------------------------------------------------|-------------------------------------------------------------------------------------------------|---------------------------------------------------------------------------------------------------------|-----------------------------------------------------------------------------------------------|-----------------------------------------------------------------------------------------------|--------------------------------------------------------------------------------------------------|
|                  |                                                                                                                                                                                                                                                                                                                                  |                                                                                                 | diagnosis of PCD.<br><br>Subgroups: <1 year,<br><5 years ≥5 years. <sup>7</sup>                         | diagnosis of PCD                                                                              |                                                                                               | diagnosis of PCD                                                                                 |
| Investigation    | <p>Presence and severity of different clinical characteristics easily available in primary and secondary care: symptoms, signs, and simple measurements (spirometry, FeNO, chest X-ray, allergy tests etc).</p> <p>Subgroups by age (&lt;1; 1-4; 5-15; 16-25; &gt;25 years) and sex (for aspects of the reproductive system)</p> | <p>Ex-vivo analysis<sup>4</sup> of ciliary function</p> <p>Sub-groups: CBF, CBP<sup>5</sup></p> | <p>Measurement of nasal NO.</p> <p>Subgroups: by analyser type; by breathing manoeuvre.<sup>8</sup></p> | Detecting mutation in PCD causing genes                                                       | Detecting protein mislocalisation by IF                                                       | Analysis of ciliary ultrastructure by a) transmission electron microscopy b) electron tomography |
| Comparator Group | In patients with a positive diagnostic outcome in comparison to a negative diagnostic outcome <sup>2</sup> .                                                                                                                                                                                                                     | In patients with a positive diagnostic outcome in comparison to a negative diagnostic outcome   | In patients with a positive diagnostic outcome in comparison to a negative diagnostic outcome           | In patients with a positive diagnostic outcome in comparison to a negative diagnostic outcome | In patients with a positive diagnostic outcome in comparison to a negative diagnostic outcome | In patients with a positive diagnostic outcome in comparison to a negative diagnostic outcome    |
| Outcome          | Diagnostic performance measures                                                                                                                                                                                                                                                                                                  | Diagnostic performance measures (including                                                      | Diagnostic performance                                                                                  | Diagnostic performance                                                                        | Diagnostic performance measures (including sensitivity,                                       | Diagnostic performance                                                                           |



|  |                                                     |                                          |                                                |                                                                                                                                                                                                |                                                                                                                                                                    |                                                |
|--|-----------------------------------------------------|------------------------------------------|------------------------------------------------|------------------------------------------------------------------------------------------------------------------------------------------------------------------------------------------------|--------------------------------------------------------------------------------------------------------------------------------------------------------------------|------------------------------------------------|
|  | (including sensitivity, specificity) <sup>3</sup> . | sensitivity, specificity) <sup>3</sup> . | measures (including sensitivity, specificity). | measures (including sensitivity, specificity).<br><br>Correlation of mutations with specific outcomes from other diagnostic tests: ciliary function (CBP and CBF), nNO, TEM, IF <sup>9</sup> . | specific).<br><br>Correlation of IF findings with specific outcomes from other diagnostic tests: ciliary function (CBP and CBF), nNO, TEM, genotype <sup>9</sup> . | measures (including sensitivity, specificity). |
|--|-----------------------------------------------------|------------------------------------------|------------------------------------------------|------------------------------------------------------------------------------------------------------------------------------------------------------------------------------------------------|--------------------------------------------------------------------------------------------------------------------------------------------------------------------|------------------------------------------------|

**Supplementary Table 2.** Search terms used by Work Groups (WG) to address the PICO driven questions. (comments linked to superscripts in footnotes)

**Footnote Comments:**

1. Diagnostic tests which are not included in a systematic review will have a narrative comment in the practice guideline, but recommendations cannot be made e.g. radioaerosol mucociliary clearance, saccharine test.
2. Ideally, we will identify manuscripts of consecutive patients referred for PCD testing, in whom the PCD diagnosis is either confirmed or excluded. In the absence of sufficient literature of this study design, the comparator group might include healthy controls, or patients with other respiratory diseases (CF, asthma, ...) from case control studies.
3. A limitation is the absence of a gold standard diagnostic test. Diagnostic performance indicators (e.g. sensitivity and specificity) will therefore firstly be comparing the inclusive decision regarding positive/ negative diagnosis. We will determine the hierarchal diagnostic criteria once we have reviewed the literature and will repeat the sensitivity/ specificity using these criteria if sufficient data exists.
4. Narrative comments can be made about obtaining samples e.g. nasal versus bronchial brushing.

5. Further sub-groups may be identified following literature search. For example, analysis of ciliary function by HSVA, by oscillometry, by computerised systems.
6. The term 'diagnostic test' is used to mean that the test is being used in a person with clinical symptoms of disease, rather than a screening tool for the general population. Some manuscripts may use the term "screening" to describe this, since the patient will require further confirmatory tests.
7. nNO is low in healthy infants, hence sub-group analyses <1 year, <5 years >5 years.
8. Sub-groups: by analyser type (chemiluminescence, hand-held); by breathing manoeuvre eg velum closure, tidal.
9. Collaboration between IF and genetics groups to tabulate associations.
10. Use of tomography to be included with TEM.

## Systematic review

We searched the OVID Medline and Embase databases using the search terms outlined in supplementary table 2 to address each PICO focussed question. In a first step, at least two researchers from each WG screened the titles and abstracts, to exclude manuscripts that clearly did not address the PICO or the WG's additional questions. In a second step, two searchers (one for genetics due to lack of researchers) reviewed the full texts of the remaining papers, to identify manuscripts that addressed the PICO and fulfilled the inclusion criteria. Third, the committee and WG members received the lists of identified papers and were asked to report any additional studies not identified by the search. All data fulfilling the a priori inclusion criteria were included. PRISMA flow diagrams show the search process for each WG (supplementary Figure 1a-f).

We included all peer reviewed manuscripts from 1996 to 14th March 2016 with no language limitations. It was decided that manuscripts predating 1996 would be unlikely to reliably diagnose PCD versus non-PCD according to current standards. We excluded conference proceedings, grey literature and studies in non-humans.

Data extraction tables were designed to capture information required for each WG. These were circulated for editing to the TF panel. Each WG decided what data was required a) to answer the PICO b) to answer additional questions. Data was extracted by two independent researchers with the exception of genetics WG which used single extraction due to lack of researchers. Since there is no reference standard for diagnosis of PCD, details of how diagnosis was confirmed/ excluded was extracted for all studies and acceptability agreed by the TF panel.

## Quality of evidence leading to recommendations

Grading of Recommendations Applicability, Development and Evaluation (GRADE) is a method for systematically assessing the quality of evidence for a diagnostic test and then making recommendations for use of the test based on the quality of this evidence. Using the GRADE approach we rated the overall quality of evidence for each question as high, moderate, low or very low, based on the following criteria: risk of bias, directness, consistency, precision and publication bias, are rated as none, not serious or serious.

The identified manuscripts were assessed on the following criteria –

1. **Study design** – for example a randomised controlled trial (although very few exist in diagnostics) would be a higher level of evidence than prospective cohort studies and these would be higher than case-control studies.
2. **Risk of bias** – We assessed risk of bias using the Quadas-2 tool for the quality assessment of diagnostic accuracy studies, based on four domains (a) patient selection; b) conduct or interpretation of index test; c) selection, conduct or interpretation of reference standard; and d) patient flow)[11].
3. **Directness**- This refers to the existence of a direct link between the diagnostic test and patient important outcomes. For intervention studies, intermediate outcomes, such as accuracy of diagnostic tests, are always considered “indirect” evidence and thus reduce the quality. Therefore, directness was graded as “potentially serious” in all WGs.
4. **Consistency**- This refers to the degree to which reported study results (e.g., sensitivity, specificity) from included studies are similar; thus heterogeneity of results was reported as inconsistency.
5. **Precision** – Precision refers to the degree of certainty concerning the estimates of each test performance (quantified by the width of confidence intervals around estimates).
6. **Publication bias** – This indicates that studies may have been published selectively and pooled estimates of published studies might not reflect the truth (e.g. negative findings have not been published, or are unavailable).

Criteria 2-6 are assessed as either serious or very serious. Grading of the evidence as HIGH, MODERATE, LOW or VERY LOW was based initially on the study design and then downgraded appropriately based on the other factors. The final grading of the evidence helped to inform the final recommendations as either STRONG (should always be done) or WEAK (should be performed in certain circumstances). For reaching recommendations, the Committee took into account the quality of the evidence; the balance between benefits and harms; the patients’ values and preferences and other factors such as costs, feasibility, accessibility etc. Evidence profiles were discussed with and across WGs electronically and by telephone conferences throughout the duration of the TF and discussed in a face-to-face meeting of the entire TF panel at the 2015 ERS Congress in Amsterdam. Sections of the manuscript were written by WG leaders and members of their groups, and again discussed and amended electronically across WGs and within the committee. Evidence that was of a lower quality than that used for recommendations was commented on in the guideline but was not used to make recommendations [12–14].

Consensus statement for diagnostic outcomes

We conducted a modified Delphi survey in four rounds to develop consensus regarding the contributions of diagnostic tests to confirm or refute a diagnosis of PCD. Only members of the Task Force with relevant expertise participated by completing online questionnaires (<https://www.isurvey.soton.ac.uk/>). Respondents were anonymous to others with the exception of the Chair (JSL) who could identify participants. Before each round participants reviewed the results of previous surveys, including a summation of comments with reasons underlying opinions and recommendations for iterations. The first round of the survey aimed to understand if any individual tests could definitively confirm or exclude a diagnosis of PCD. In the second round each Delphi participant was asked to review the summary of responses from round 1; they were then invited to consider combinations of tests that might confirm or exclude a diagnosis when the diagnosis is considered clinically very likely, or only modest. In round 3 and 4 there were further iterations. A consensus was reached when 80% of participants were in agreement.

# Results

## Literature search

The outcomes of the literature searches for each work group are summarised by PRISMA flowcharts (supplementary figure 1a-f)

Supplementary figure 1 a-f: Identification, screening and inclusion of studies reporting on a) PCD clinical symptoms b) nasal nitric oxide c) high-speed video microscopy d) transmission electron microscopy e) genetics f) immunofluorescence. Flow charts are based on PRISMA guidelines.

## a) Clinical Features

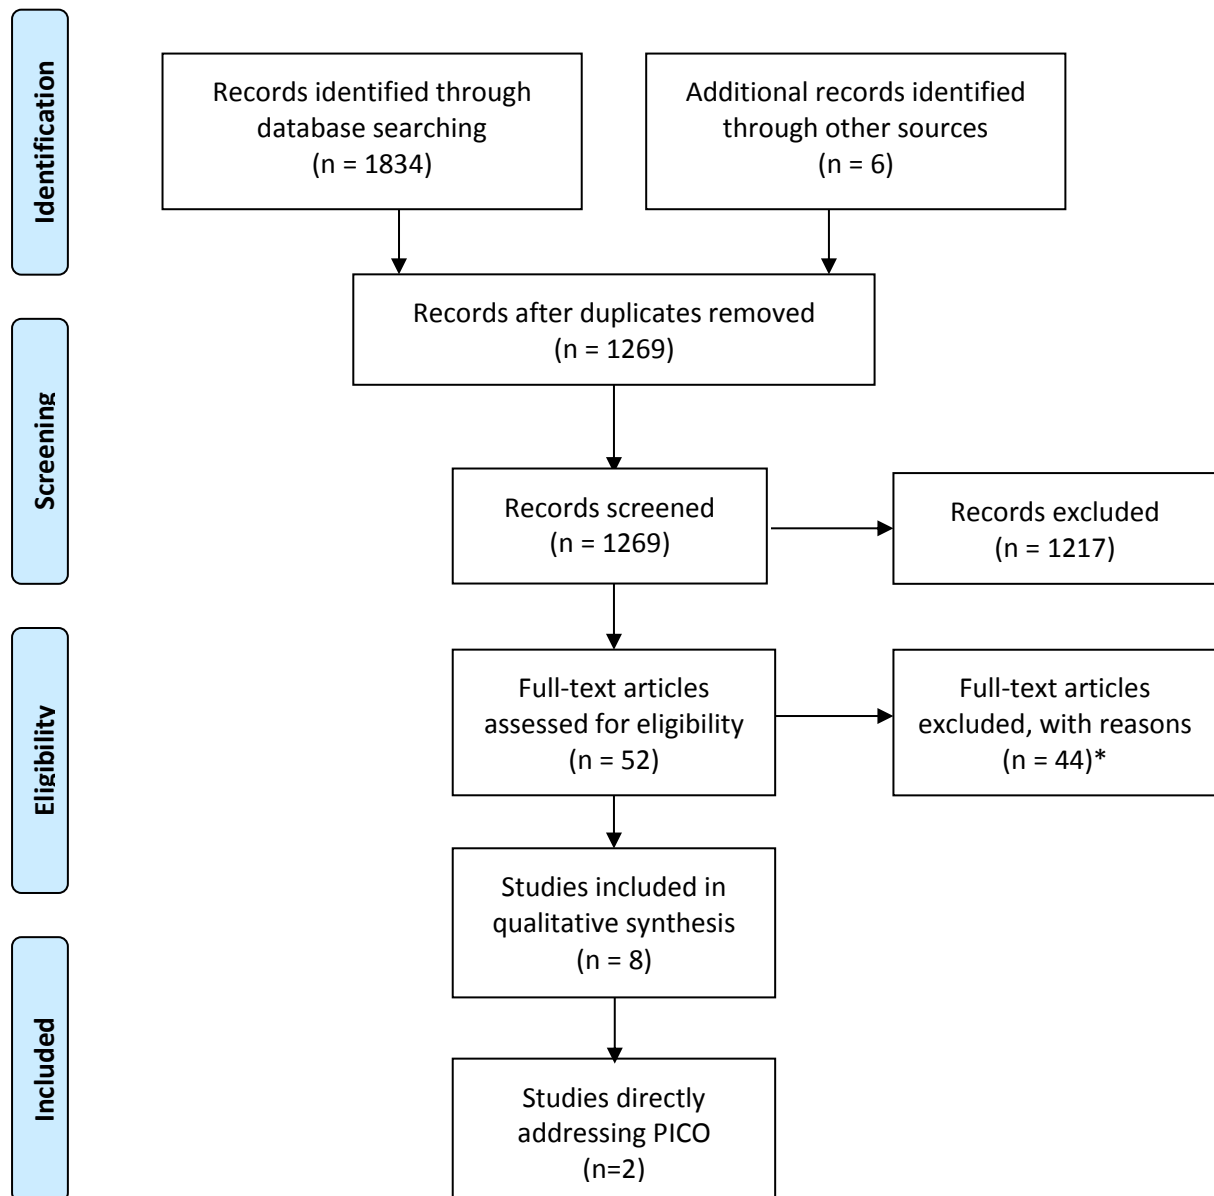

## b) Nasal Nitric Oxide

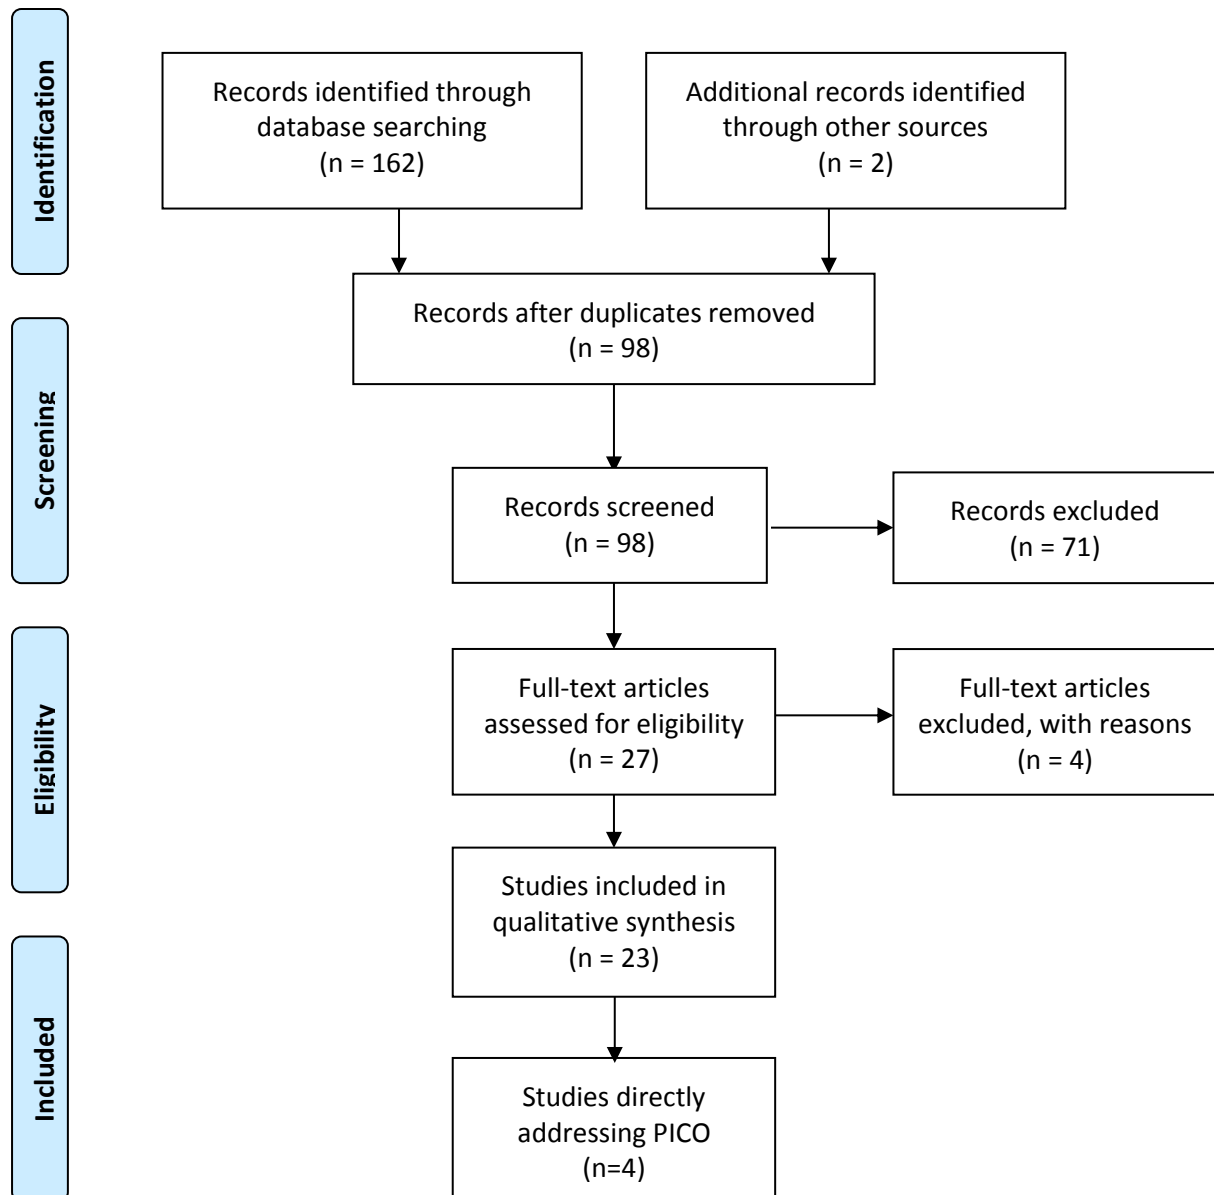



### c) High Speed Video

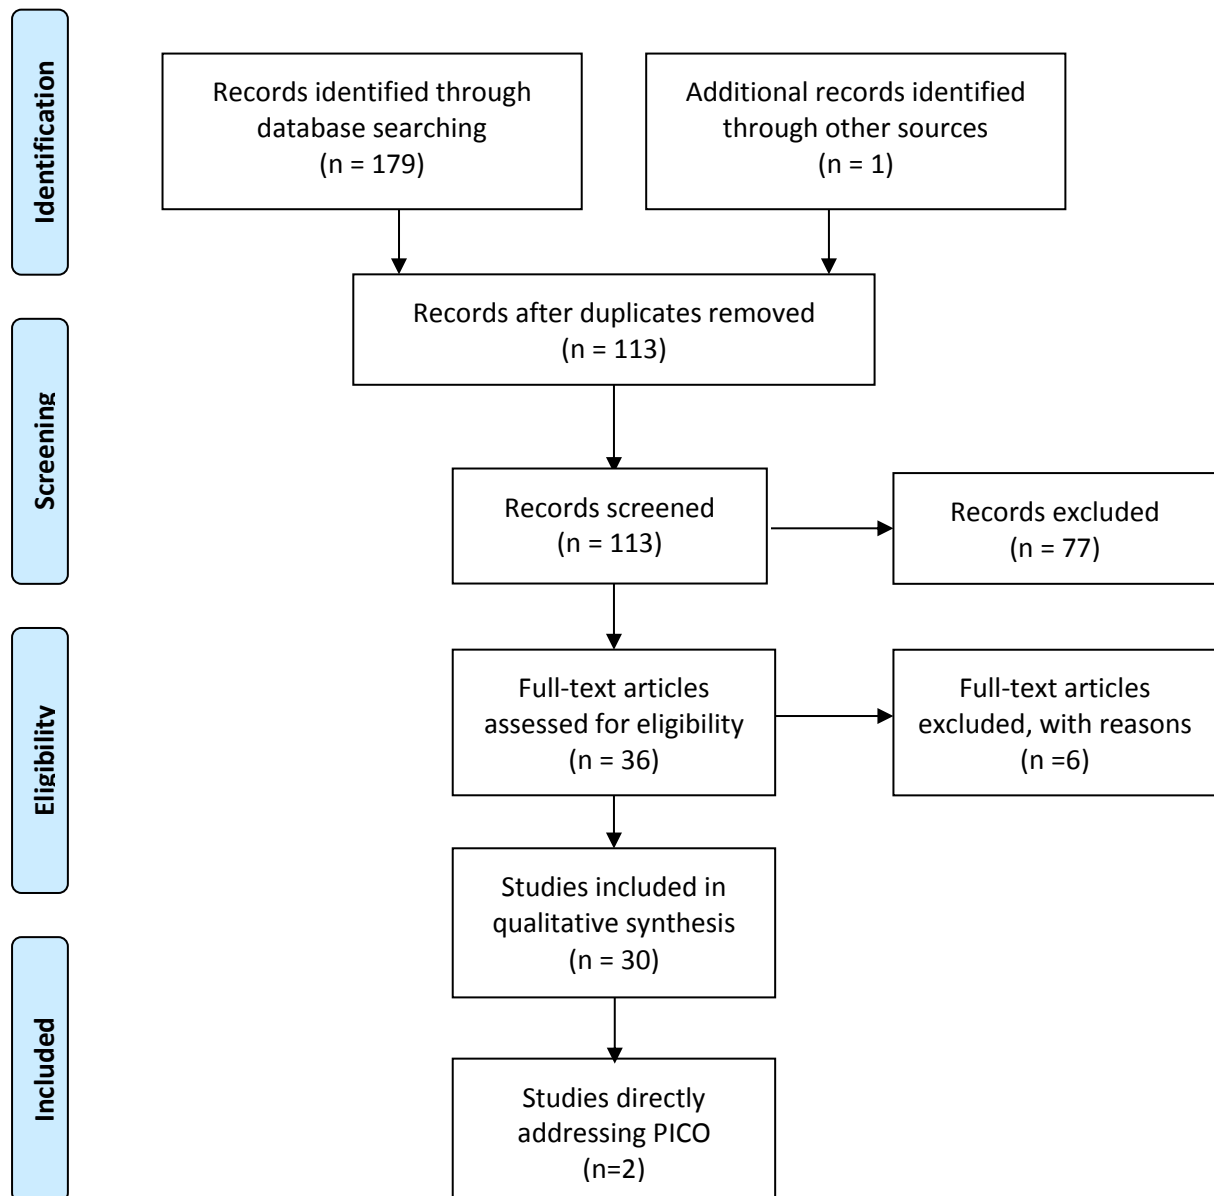

## d) TEM

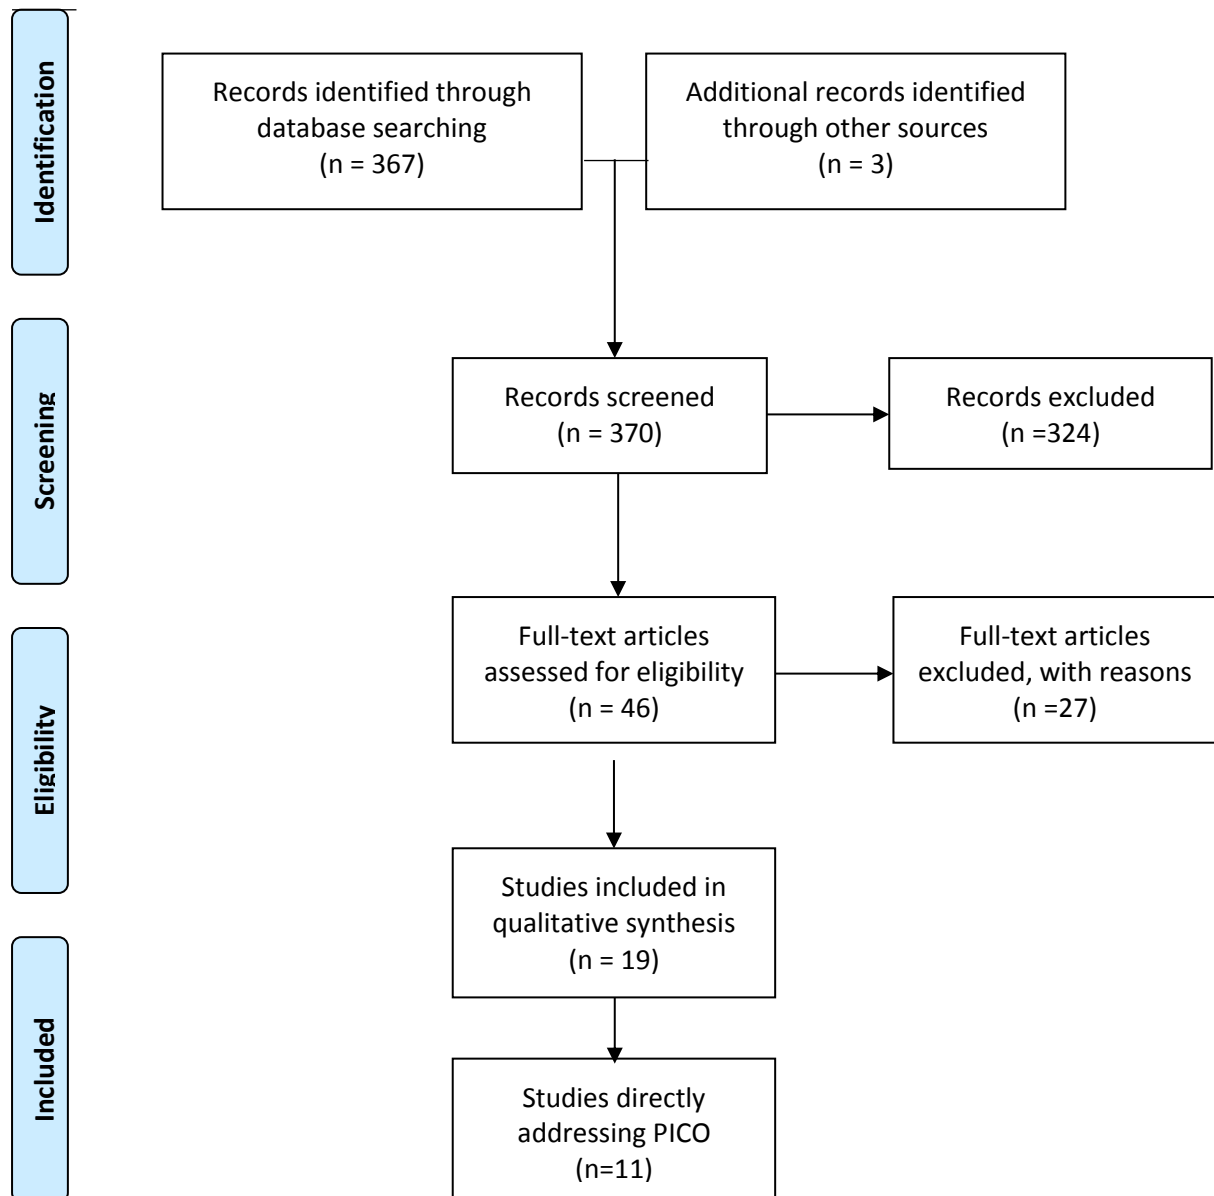

## e) Genetics

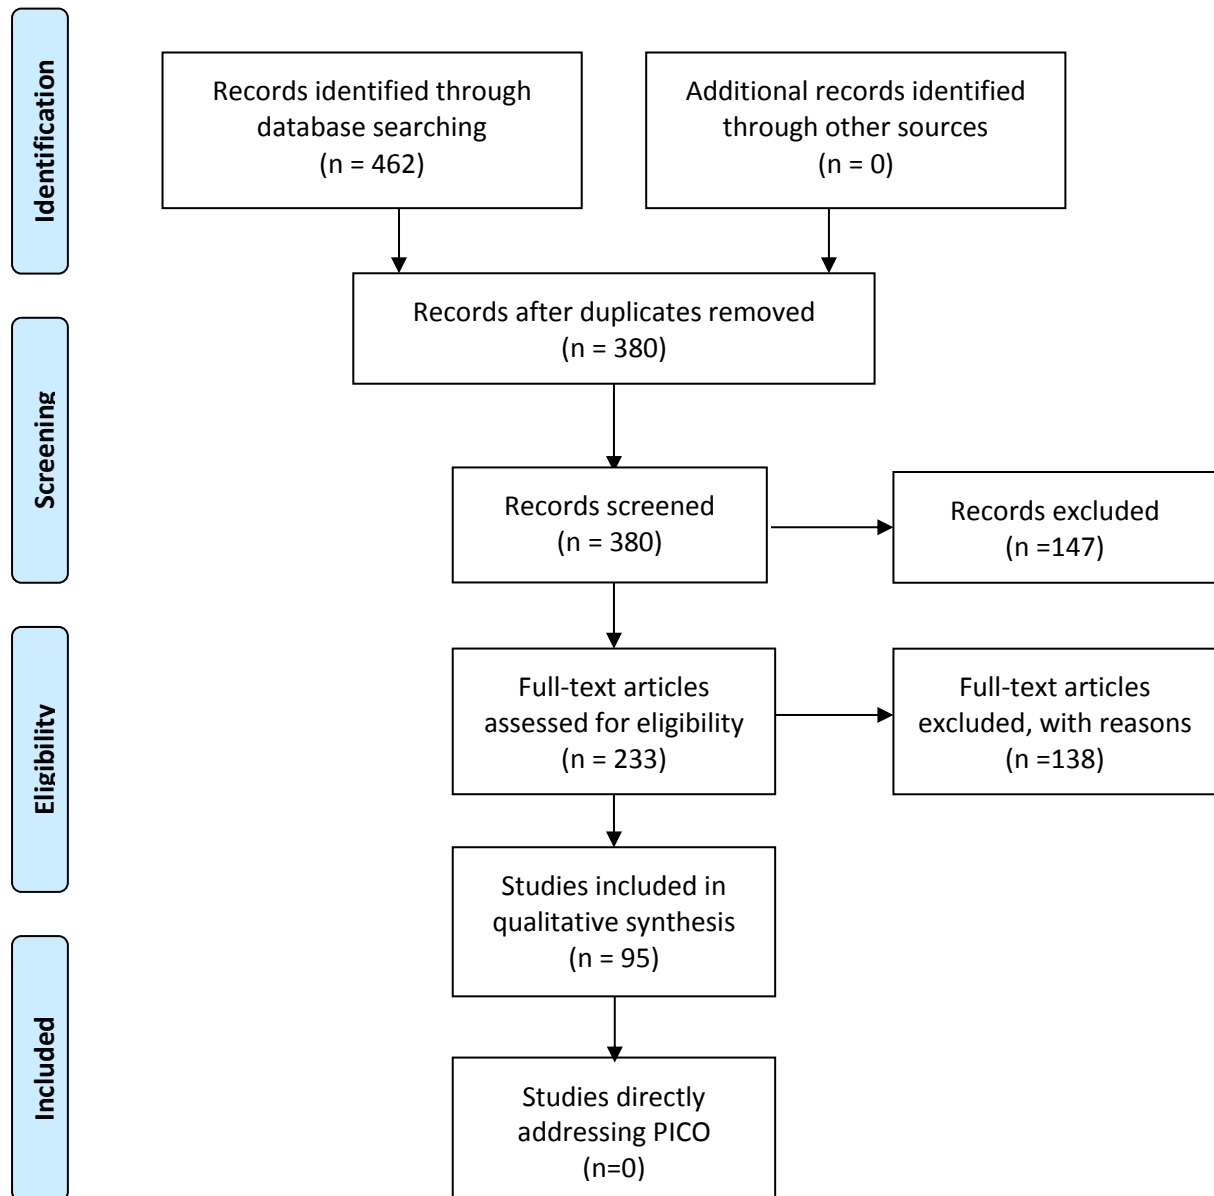

f) IF

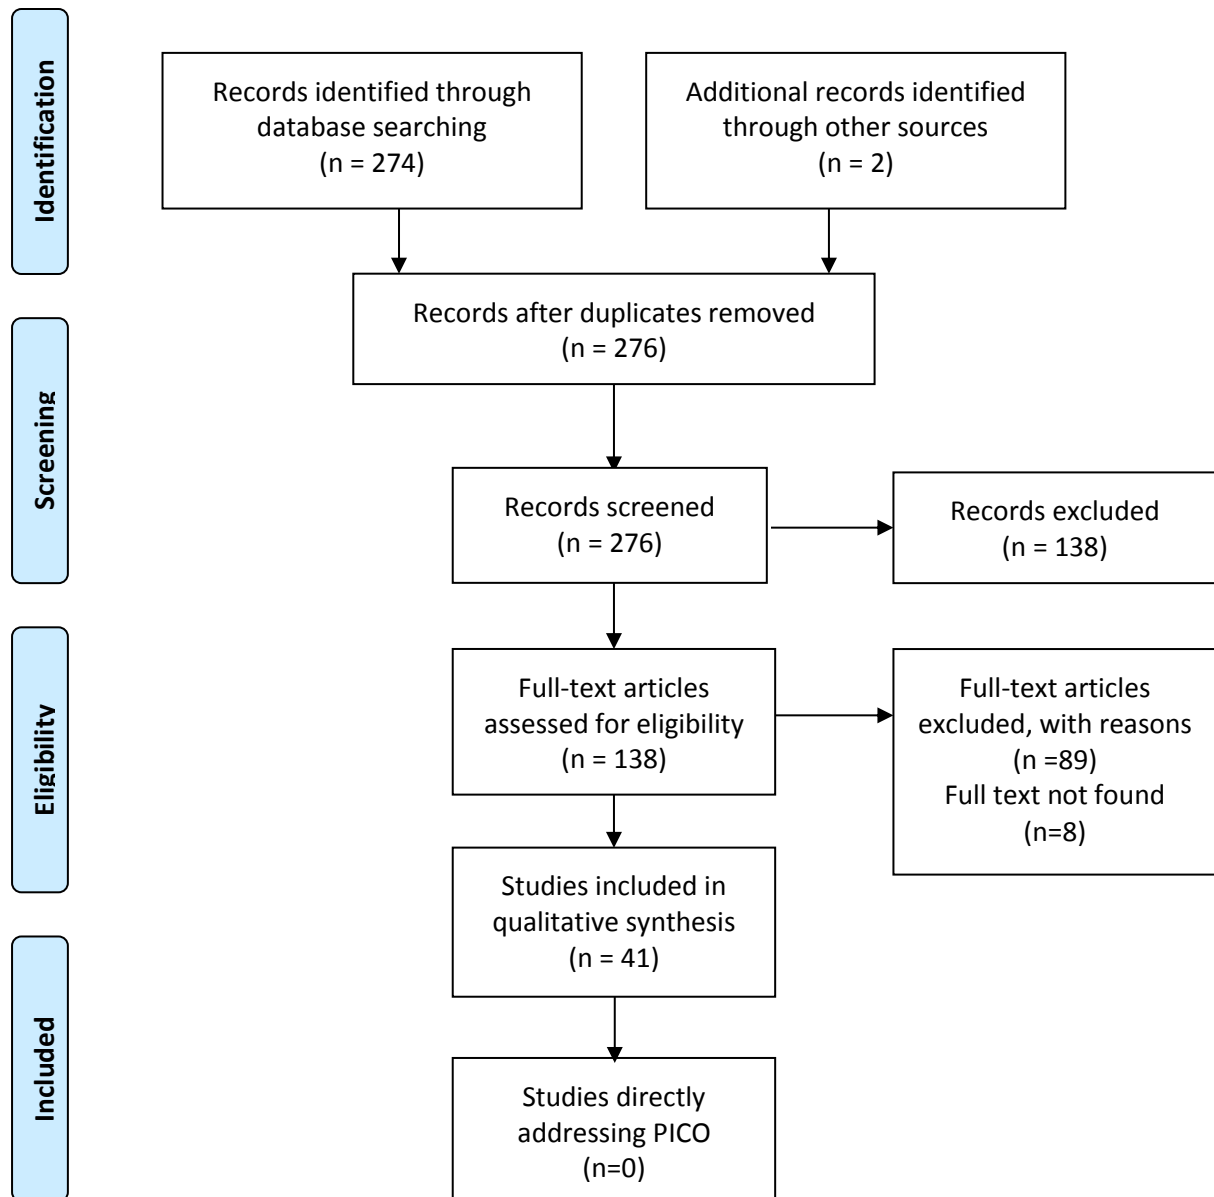

## Manuscripts contributing to the qualitative review

Each search identified a number of manuscripts which provided relevant information regarding PCD diagnostic testing. The full text was critiqued to establish whether each manuscript fulfilled the criteria needed to contribute to the quantitative analysis (sensitivity and specificity). Those manuscripts which did not fulfil these strict criteria were used to address other important questions regarding PCD diagnostic testing, contributing to the narrative discussion. The summaries of these manuscripts are provided in Supplementary Tables 3-8.

| Publication            | Study design                                                                                    | Reason for exclusion/ comments                                                              |
|------------------------|-------------------------------------------------------------------------------------------------|---------------------------------------------------------------------------------------------|
| Ben Khelifa et al 2014 | Retrospective cohort study of patients with asthenozoospermia                                   | Cohort with different study population<br>PCD diagnosis only by genetic mutations (DNAH1)   |
| Bouyahia et al 2008    | Retrospective cohort study of patients with bronchiectasis                                      | Cohort with different study population<br>Patients with uncertain TEM results were excluded |
| Coste et al 2004       | Prospective cohort study of patients with atypical chronic sinusitis                            | Cohort with different study population                                                      |
| Garrod et al 2014      | Prospective cohort study of patients with congenital heart disease                              | Cohort with different study population                                                      |
| Goeminne et al 2010    | Retrospective cohort study of patients with non-CF bronchiectasis                               | Cohort with different study population                                                      |
| Guan et al 2015        | Prospective cohort study of patients with bronchiectasis                                        | Cohort with different study population                                                      |
| Gurr et al 2009        | Retrospective lab study on ear mucosa samples from patients with chronic secretory otitis media | No sufficient information on clinical symptoms                                              |
| Kim et al 2010         | Retrospective cohort study of patients with bronchiectasis                                      | Cohort with different study population                                                      |
| Kumar et al 2015       | Retrospective cohort study of patients with non-CF bronchiectasis                               | No proven diagnosis of PCD<br>PCD is only suspected (use of FeNO) and not diagnosed         |
| Li et al 2005          | Retrospective cohort study of patients with non-CF bronchiectasis                               | Cohort with different study population                                                      |
| Lopes et al 2015       | Prospective cohort study of patients with bronchiectasis                                        | Cohort with different study population                                                      |
| Nakhleh et al 2012     | Retrospective cohort study of patients with congenital heart disease and heterotaxy             | Cohort with different study population                                                      |
| Niu et al              | Retrospective cohort study of patients with                                                     | Cohort with different study population                                                      |

|                                |                                                                                                               |                                                                                                                    |
|--------------------------------|---------------------------------------------------------------------------------------------------------------|--------------------------------------------------------------------------------------------------------------------|
| 2011                           | asthenozoospermia                                                                                             |                                                                                                                    |
| Noone et al<br>2014            | Retrospective cohort study of patients suspected of PCD                                                       | Reported symptoms only in PCD positive patients                                                                    |
| Offen et al<br>2014            | Retrospective cohort study of patients with congenital heart disease and dextrocardia                         | Cohort with different study population                                                                             |
| Pifferi et al<br>2004          | Prospective cohort of patients with history of recurrent lower respiratory infections and bronchiectasis      | No sufficient information on clinical symptoms<br>Paper is focused on describing a specific ultrastructure anomaly |
| Pifferi et al<br>2009          | Prospective cohort study of patients with recurrent pneumonia                                                 | Cohort with different study population                                                                             |
| Qi et al<br>2015               | Prospective cohort study of patients with bronchiectasis                                                      | Cohort with different study population                                                                             |
| Santamaria et al<br>2009       | Retrospective cohort study of patients with bronchiectasis                                                    | Cohort with different study population                                                                             |
| Shapiro et al<br>2010          | Retrospective cohort of patients with suspicion of PCD                                                        | Conference abstract                                                                                                |
| Shoemark et al<br>2007         | Prospective cohort of patients with symptoms suspected for bronchiectasis                                     | Cohort with different study population                                                                             |
| Stewart et<br>2014             | Retrospective cohort of patients with congenital heart disease undergoing cardiac surgery                     | Cohort with different study population                                                                             |
| Tsang et<br>2015               | Prospective cohort of patients with bronchiectasis                                                            | Cohort with different study population                                                                             |
| Welch et al<br>2004            | Prospective cohort of patients with history of recurrent or chronic upper or lower respiratory tract problems | Reported symptoms only in PCD positive patients                                                                    |
| Zahid et al<br>2012            | Retrospective cohort of patients with transposition of great arteries                                         | Cohort with different study population                                                                             |
| Zahid et al<br>2014            | Retrospective cohort of patients with transposition of great arteries                                         | Cohort with different study population                                                                             |
| Zaid et al<br>2010             | Retrospective cohort of patients with non CF-bronchiectasis                                                   | Cohort with different study population                                                                             |
| Al Saadi et al<br>2013         | Case control study comparing PCD patients with healthy controls                                               | No sufficient information on clinical symptoms                                                                     |
| Armengot et al<br>2012         | Case control study comparing PCD patients with healthy controls and patients with SCD                         | Reported symptoms only in PCD positive patients                                                                    |
| Boon et al<br>2014             | Case control study comparing PCD patients with healthy and disease controls                                   | Reported symptoms only in PCD positive patients                                                                    |
| Cohen-Cymberknoh et al<br>2012 | Case control study comparing patients with PCD and CF                                                         | Conference abstract                                                                                                |

|                            |                                                                                       |                                                 |
|----------------------------|---------------------------------------------------------------------------------------|-------------------------------------------------|
| Cohen-Cymerknoh et al 2014 | Case control study comparing patients with PCD and CF                                 | No sufficient information on clinical symptoms  |
| Irving et al 2013          | Case control study comparing patients with PCD and CF                                 | No sufficient information on clinical symptoms  |
| Knowles et al 2014         | Case control study comparing patients with different TEM defects and healthy controls | Reported symptoms only in PCD positive patients |
| Madsen et al 2013          | Case control study comparing PCD patients with healthy controls                       | Reported symptoms only in PCD positive patients |
| Mahut et al 2006           | Case control study comparing PCD patients with healthy controls                       | Reported symptoms only in PCD positive patients |
| Oktem et al 2013           | Case control study comparing PCD patients with healthy controls                       | No sufficient information on clinical symptoms  |
| Olm et al 2011             | Case control study comparing PCD patients with healthy controls                       | Reported symptoms only in PCD positive patients |
| Paff et al 2013            | Case control study comparing PCD patients with healthy controls and CF patients       | No sufficient information on clinical symptoms  |
| Paraskakis et al 2007      | Case control study comparing PCD patients with healthy controls                       | No sufficient information on clinical symptoms  |
| Phillips et al 1998        | Case control study comparing PCD patients with healthy controls                       | No sufficient information on clinical symptoms  |
| Regnis et al 2000          | Case control study comparing PCD patients with healthy controls and CF patients       | No sufficient information on clinical symptoms  |
| Santamaria et al 2014      | Case control study comparing PCD patients with healthy controls                       | Reported symptoms only in PCD positive patients |
| Shapiro et al 2011         | Case control study of patients with heterotaxy, PCD positive and negative             | Conference abstract                             |

Supplementary Table 3. Clinical symptoms workgroup. Summary of the 44 excluded full-text studies on clinical manifestations of PCD and the reasons of exclusion. CF: cystic fibrosis, SCD: secondary ciliary dyskinesia

| Publication             | Study population                            | Ages                                                                 | Aim of study                                                                                                       | Analyser                                                                           | Sampling method                                                |
|-------------------------|---------------------------------------------|----------------------------------------------------------------------|--------------------------------------------------------------------------------------------------------------------|------------------------------------------------------------------------------------|----------------------------------------------------------------|
| Marthin & Nielsen 2011  | 117 referrals<br>PCD 14                     | 6.9 (0.0-62.4)<br>Median (range)                                     | Evaluate 3 different sampling methods for nNO in consecutive referrals to a PCD service                            | NIOX Flex (Aerocrine, Sweden)                                                      | Breath hold (n=58)<br>Oral exhalation ag<br>Tidal breathing (n |
| Leigh <i>et al</i> 2013 | 155 referrals<br>PCD 71<br>Indeterminate 84 | PCD 23.3 (5.1-69.0)<br>Indeterminate 31.8 (5.5-79.6)<br>Mean (range) | Use a standard protocol for nNO measurement to establish disease specific cut-offs then validate at 6 other sites. | Sievers, CLD 88SP (ECO PHYSICS/MEDICS, Switzerland), NIOX Flex (Aerocrine, Sweden) | Oral exhalation, v<br>(n=?, 77 )                               |
| Beydon et al 2015       | 86 referrals<br>PCD 49<br>Non-PCD 37        | Median 8.9y<br>IQR (5.7-12.8)                                        | Assess the accuracy of velum closure and 3 different tidal breathing measurements in diagnosing PCD                | Niox Flex (Aerocrine, Sweden), Endono 8000 (manufacture unknown)                   | Velum closure (n=<br>Tidal breathing – 5                       |
| Jackson et al           | 301 referrals<br>PCD 34<br>Non-PCD 267      | Range 6-79 years                                                     | Accuracy of nNO screening by velum closure in consecutive referrals for PCD diagnosis                              | NIOx Flex (Aerocrine, Sweden)                                                      | Velum closure (br<br>(n=301, 30)                               |

**Supplementary Table 4:** Nasal nitric oxide workgroup. Methodological details of the nasal nitric oxide studies directly addressing the PICO.



| Publication              | Study summary                                                                        | Comments/ Exclusion reason                                                                   |
|--------------------------|--------------------------------------------------------------------------------------|----------------------------------------------------------------------------------------------|
| Arnal et al 1999         | Case control study of nasal polyposis, sinusitis, Kartagener's and healthy controls  | PCD – Kartagener's, clinical diagnosis only<br>Not consecutive patients                      |
| Narang et al 2002        | Case-control study of breath hold nNO in PCD, disease control and healthy            | Case-control, not consecutive referrals                                                      |
| Horvath et al 2003       | Case control study of PCD, CF, Bronchiectasis and healthy                            | Case-control, not consecutive referrals                                                      |
| Wodehouse et al 2003     | Case-control of PCD, disease control and healthy                                     | Case-control, not consecutive referrals                                                      |
| Corbelli et al 2004      | Prospective cohort in symptomatic children                                           | Unclear if consecutive referrals, blinding not stated, inconsistencies in reported numbers   |
| Noone et al 2004         | Prospective case control study, PCD, CF and disease controls                         | Case-control, not consecutive referrals and unclear diagnostic criteria                      |
| Pifferi et al 2007       | Prospective cohort study of those with recurrent pneumonia                           | Diagnosis based on TEM only, nNO results used to retrospectively assign diagnosis            |
| Santamaria et al 2008    | Case-control study PCD vs Healthy                                                    | Case-control, not consecutive referrals                                                      |
| Moreno Galdo et al 2010  | Case control of PCD vs healthy and disease controls                                  | PCD based on TEM diagnosis only                                                              |
| Mateos-Corral et al 2011 | Case control, PCD, Healthy, other disease controls                                   | PCD diagnosis symptoms and EM only, not consecutive patients                                 |
| Montella et al 2011      | Case control PCD vs disease controls                                                 | Comparing different sampling methods not diagnostic accuracy in referrals                    |
| Marthin et al 2013       | Case control study of different analysers                                            | Case-control, not consecutive referrals                                                      |
| Boon et al 2014          | Case-control PCD vs healthy and disease controls                                     | Case-control, not consecutive referrals                                                      |
| Collins et al 2014       | Systematic review and meta-analysis of nNO                                           | Covers studies in this review and includes both case-control and cohort studies              |
| Harris et al 2014        | Case-control study of differing sampling techniques                                  | Covers studies in this review and includes both case-control and cohort studies              |
| Pifferi et al 2007       | Cohort study of recurrent pneumonia (PCD, secondary dyskinesia and healthy controls) | SCD cases determined only in retrospect, sampling method unclear<br>Not consecutive patients |
| Adams et al 2015         | Case-control study of nNO in under 1s                                                | Not consecutive referrals, healthy controls only                                             |
| Kouis et al 2015         | Systematic review/meta-analysis of nNO                                               | Covers studies in this review and includes both case-control and cohort studies              |
| Amirav et al 2016        | Cohort study on high speed video                                                     | No data on nNO given                                                                         |

Supplementary Table 5. Nasal nitric oxide workgroup. Summary of studies excluded at the full-text stage with reason for exclusion.

| Publication            | Study summary                                                  | Comments/ Exclusion reason                                          |
|------------------------|----------------------------------------------------------------|---------------------------------------------------------------------|
| Rayner et al 1996      | Case-control study of beat pattern                             | Saccharine and TEM diagnosis only                                   |
| Chapelin et al 1997    | Nasal brushings in those with recurrent respiratory infections | Beat frequency only                                                 |
| Bent et al 1997        | Tracheal biopsies                                              | Subjective movement only, no measurements                           |
| Santamaria et al 1999  | Case-control study chronic infection vs controls               | Subjective motility only                                            |
| Friedman et al 2000    | Retrospective cohort study                                     | Light microscopy only                                               |
| Jorissen et al 2000    | Retrospective cohort study (primary and secondary dyskinesia)  | Not consecutive referrals                                           |
| Pifferi et al 2001     | Response of ciliary motion to intensive treatment              |                                                                     |
| Ahmad et al 2003       | Retrospective cohort study                                     | Diagnosis criteria for PCD not clear                                |
| Chilvers et al 2003    | Cohort of PCD patients                                         | No negative patients                                                |
| Coste et al 2004       | Prospective cohort study                                       | Stroboscopy only                                                    |
| Nuesslein et al 2004   | Prospective case-control study in bronchitis patients          | Compares nose and bronchus not positive vs negative PCD             |
| Pifferi et al 2007     | Retrospective nasal NO study                                   | Not a study of HSV, little detail on ciliary assessment             |
| Pifferi et al 2009     | Prospective cohort of PCD, SCD and inconclusive                | Comparison of HSV before/after culture                              |
| Armengot et al 2010    | Case control PCD, SCD and healthy                              | Not consecutive referrals, unclear criteria for diagnosis of PCD    |
| Hirst et al 2010       | Retrospective cohort study of abnormalities after ALI          | Correlation before/after ALI                                        |
| O'Callaghan et al 2010 | Retrospective cohort                                           | Epidemiological study, no details of ciliary assessment             |
| Stannard et al 2010    | Retrospective case-control study                               | Diagnosis of PCD by TEM only                                        |
| Noll et al 2011        | Retrospective cohort                                           | Photoelectrical method only                                         |
| Shoemark et al 2012    | Retrospective cohort                                           | Study of TEM findings so little detail of ciliary assessment        |
| Pifferi et al 2013     | Prospective cohort of ciliary assessment                       | Not study of HSV, investigating different ciliary motion parameters |
| Boon et al 2014        | Cohort of PCD positive patients                                | No negatives                                                        |

|                     |                                                         |                                                               |
|---------------------|---------------------------------------------------------|---------------------------------------------------------------|
| Hirst et al 2014    | Case control study of ALI                               |                                                               |
| Kim et al 2014      | Genetic study in PCD cases                              | Very little HSV data                                          |
| Parrilla et al 2014 | Case control study of ciliary assessment methods        | Study of assessment methods                                   |
| Raidt et al 2014    | Prospective cohort                                      | Studying genetic/TEM correlation with beat pattern            |
| Pifferi et al 2015  | Prospective case-control study                          | Not study of HSV                                              |
| Amirav et al 2015   | Retrospective cohort                                    | Not clearly a cohort of suspected PCD, reference test unclear |
| Quinn et al 2015    | Establishing system for computational analysis of CBP/F | Not consecutive referrals                                     |

**Supplementary Table 6.** High speed video microscopy workgroup. Summary of studies excluded at full-text review stage with reason for exclusion.

| Publication            | Study summary                                                     | Comments/ Exclusion reason                                                                                                   |
|------------------------|-------------------------------------------------------------------|------------------------------------------------------------------------------------------------------------------------------|
| Jorisson et al 2000    | Retrospective cohort study                                        | Duplication of cohort data in a study already included in the PICO (The larger study more relevant to TEM has been included) |
| Escudier et al 2002    | Computer assisted analysis aids detection of IDAs                 | TEM add on technique study                                                                                                   |
| Stannard et al 2010    | Retrospective case-control study                                  | Diagnosis of PCD by TEM only                                                                                                 |
| O'Callaghan et al 2011 | Retrospective cohort study.<br>IDA defects require repeat testing | TEM only                                                                                                                     |
| Olin et al 2011        | Diagnostic yield of nasal scrapes<br>Retrospective cohort         | TEM only                                                                                                                     |
| Boon et al 2014        | Cohort PCD positive patients                                      | No negatives                                                                                                                 |
| Funkhouser et al, 2014 | Computer assisted analysis aids TEM performance                   | TEM add on technique study                                                                                                   |
| Wallmeier et al 2014   | Gene discovery study                                              | Not consecutive referrals                                                                                                    |

**Supplementary Table 7.** Transmission electron microscopy workgroup. Summary of studies excluded at full-text review stage with reason for exclusion.



| <b><u>Publication</u></b> | <b><u>Study design</u></b>                                                                                                | <b><u>Reason for exclusion/ comments</u></b>                   |
|---------------------------|---------------------------------------------------------------------------------------------------------------------------|----------------------------------------------------------------|
| Janitzl et al 1999        | Genetic testing for HSET gene mutations in PCD patients                                                                   | Genetics not used as a diagnostic tool                         |
| Pennarum et al 1999       | Genetic testing for Loss-of-Function Mutations in IC78                                                                    | Genetics not used as a diagnostic tool                         |
| Witt et al 1999           | Candidate careening for chromosome 7 in syndrome di Kartagener                                                            | Genetics not used as a diagnostic tool                         |
| Blouin et al 2000         | Genome-wide linkage analysis in PCD patients                                                                              | Only linkage study, no diagnostic testing                      |
| Maiti et al 2000          | Evaluations of the FOXJ1 in patients with PCD                                                                             | Screening test for possible mutations, no diagnostic testing   |
| Meeks et al 2000          | Linkage study chromosome 19                                                                                               | Only linkage study, no diagnostic testing                      |
| Omran et al 2000          | Candidate gene screening Chromosome 5p and DNAH5                                                                          | Only linkage study, no diagnostic testing                      |
| Pennarun et al 2000       | Candidate gene screening DNAI2                                                                                            | Only linkage study, no diagnostic testing                      |
| Bartoloni et al 2001      | Candidate gene screening DNAH9                                                                                            | Only linkage study, no diagnostic testing                      |
| Guichard et al 2001       | Genetic testing for DNAI1 Mutations in PCD                                                                                | Genetics not used as a diagnostic tool                         |
| Zariwala et al 2001       | Genetic testing for DNAI1 in PCD                                                                                          | Genetics not used as a diagnostic tool                         |
| Bartoloni et al 2002      | Genetic testing for DNAH11 in situs inversus totalis                                                                      | Genetics not used as a diagnostic tool                         |
| Neesen et al 2002         | Candidate gene screening of human ortholog of the t-complex-encoded protein TCTE3 in PCD                                  | Only linkage study, no diagnostic testing                      |
| Noone et al 2002          | Genetic testing for DNAI1 in PCD                                                                                          | Genetics not used as a diagnostic tool                         |
| Olbrich et al 2002        | Genetic testing for DNAH5 in PCD patients                                                                                 | Genetics not used as a diagnostic tool                         |
| Pennarun et al 2002       | Candidate gee screening of the Human hPF20Gene Orthologous                                                                | Only linkage study, no diagnostic testing                      |
| Zhang et al 2002          | Identification of Dynein Heavy Chain 7 in bronchial cells in PCD patients                                                 | Protein localisation in bronchial cells, no diagnostic testing |
| Zito et al 2003           | Genetic testing for RPGR mutation in patients with retinitis pigmentosa, impaired hearing, and sinorespiratory infections | Genetics not used as a diagnostic tool                         |

|                              |                                                                                                   |                                              |
|------------------------------|---------------------------------------------------------------------------------------------------|----------------------------------------------|
| Jeganathan et al 2004        | Candidate gene screening of chromosome 16p12.1-12.2 and 15q13.1-15.1                              | Letter, linkage study                        |
| Zariwala et al 2003          | Investigation of the Possible Role of a Novel Gene, DPCD, in Primary Ciliary Dyskinesia           | Genetics not used as a diagnostic tool       |
| Fliegauf et al 2005          | Genetic testing of DNAH5 and DNAH9 in Respiratory Cells from Patients with PCD                    | Genetics not used as a diagnostic tool       |
| Geremek et al 2006           | Linkage analysis on chromosome 15q24–25 in Kartagener syndrome                                    | Only linkage study, no diagnostic testing    |
| Gutierrez-Roelens et al 2006 | Localization of candidate regions for a novel gene for Kartagener syndrome                        | Candidate gene search, no diagnostic testing |
| Hornef et al 2006            | Genetic testing for DNAH5 Mutations in PCD with Outer Dynein Arm Defects                          | Genetics not used as a diagnostic tool       |
| Moore et al 2006             | Genetic testing for RPGR in primary ciliary dyskinesia and retinitis pigmentosa                   | Genetics not used as a diagnostic tool       |
| Zariwala et al 2006          | Mutations of DNAI1 in Primary Ciliary Dyskinesia Evidence of Founder Effect in a Common Mutation  | Genetics not used as a diagnostic tool       |
| Duriez et al 2007            | Genetic testing for TXNDC3 in PCD                                                                 | Genetics not used as a diagnostic tool       |
| Failly et al 2008            | Genetic testing per DNAI1 mutations in PCD                                                        | Genetics not used as a diagnostic tool       |
| Geremek et al 2008           | Sequence analysis of 21 genes located in the Kartagener syndrome linkage region on chromosome 15q | Only linkage study, no diagnostic testing    |
| Loges et al 2008             | Genetic testing for DNAI2 mutations in ODA defects                                                | Genetics not used as a diagnostic tool       |
| Omran et al 2008             | Genetic testing for KTU mutations in ODA+IDA defects                                              | Genetics not used as a diagnostic tool       |
| Schwabe et al 2008           | Genetic testing for DNAH11 mutations in normal axoneme ultrastructure suspected PCD patients      | Genetics not used as a diagnostic tool       |
| Wessels et al 2008           | Candidate Gene Analysis in Three Families With acilia Syndrome                                    | Candidate gene search, no diagnostic testing |
| Zuccarello et al 2008        | Mutations in dynein genes in patients affected by isolated non-syndromic asthenozoospermia        | no PCD population, only asthenozoospermia    |

|                        |                                                                                                            |                                        |
|------------------------|------------------------------------------------------------------------------------------------------------|----------------------------------------|
| Castelman et al 2009   | Genetic testing in in Radial Spoke Head Protein Genes, RSPH9 and RSPH4A in PCD                             | Genetics not used as a diagnostic tool |
| Duquesnoy et al 2009   | Genetic testing for LRRC50 mutations in PCD                                                                | Genetics not used as a diagnostic tool |
| Loges et al 2009       | Genetic testing for LRRC50 mutations in PCD                                                                | Genetics not used as a diagnostic tool |
| Lie et al 2010         | Founder splice mutation of DNAI1 in Amish community                                                        | Genetics not used as a diagnostic tool |
| Pifferi et al 2010     | Genetic testing for DNAH11 mutations in normal axoneme ultrastructure suspected PCD patients               | Genetics not used as a diagnostic tool |
| Reish et al 2010       | Founder mutation(s) in the RSPH9 gene leading to primary ciliary dyskinesia in two inbred Bedouin families | Genetics not used as a diagnostic tool |
| Zietkiewicz et al 2010 | Population specificity of the DNAI1 gene mutation spectrum in PCD                                          | Genetics not used as a diagnostic tool |
| Becker-Heck et al 2011 | Genetic testing for CCDC40 mutations in PCD patients                                                       | Genetics not used as a diagnostic tool |
| Berg et al 2011        | Next generation parallel sequencing of targeted exomes in PCD for 79 genes                                 | Genetics not used as a diagnostic tool |
| Mazor et al 2011       | Genetic testing for DNAL1 mutations in PCD                                                                 | Genetics not used as a diagnostic tool |
| Merveille et al 2011   | Genetic testing for CCDC39 mutations in PCD                                                                | Genetics not used as a diagnostic tool |
| Alsaadi et al 2012     | WES screening for RSPH9                                                                                    | Genetics not used as a diagnostic tool |
| Blanchon et al 2012    | Genetic testing for CCDC39/CCDC40 mutations in PCD                                                         | Genetics not used as a diagnostic tool |
| Djakow et al 2012      | Genetic testing for DNAH5 and DNAI1 in PCD                                                                 | Genetics not used as a diagnostic tool |
| Horani et al 2012      | Whole-Exome Capture and Sequencing identifies HEATR2 Mutation in PCD                                       | Genetics not used as a diagnostic tool |
| Knowles et al 2012     | Genetic testing for DNAH11 mutations in highly suspected PCD                                               | Genetics not used as a diagnostic tool |
| Kott et al 2012        | Genetic testing for LRRC6 mutations in PCD                                                                 | Genetics not used as a diagnostic tool |
| Lucas et al 2012       | Genetic testing for mutations in DNAH11 in PCD                                                             | Genetics not used as a diagnostic tool |
| Mitchison et al 2012   | Genetic testing for mutations in DNAAF3 in PCD                                                             | Genetics not used as a diagnostic tool |



|                            |                                                                                                                                    |                                        |
|----------------------------|------------------------------------------------------------------------------------------------------------------------------------|----------------------------------------|
| Nakhleh et al 2012         | NGS screening for 14 PCD genes in heterotaxy patient                                                                               | Genetics not used as a diagnostic tool |
| Olbrich et al 2012         | Genetic testing for HYDIN mutation in patients with normal ultrastructure                                                          | Genetics not used as a diagnostic tool |
| Panizzi et al 2012         | Genetic testing for CCDC103 mutations in PCD                                                                                       | Genetics not used as a diagnostic tool |
| Zietkiewicz et al 2012     | Genetic testing for CCDC39/CCDC40 mutations in PCD                                                                                 | Genetics not used as a diagnostic tool |
| Antony et al 2013          | Genetic testing for CCDC39 and CCDC40 in PCD positive patients                                                                     | Genetics not used as a diagnostic tool |
| Bukowy-Bieryllo et al 2013 | Genetic testing for RPGR Mutations                                                                                                 | Genetics not used as a diagnostic tool |
| D'Andrea et al 2013        | Case report of coinheritance of Glanzmann thrombasthenia and primary ciliary dyskinesia                                            | Genetics not used as a diagnostic tool |
| Daniels et al 2013         | Identification of Founder mutation in RSPH4A in PCD                                                                                | Genetics not used as a diagnostic tool |
| Ferkol et al 2013          | Genome-wide homozygosity mapping, linkage analyses, targeted mutation analyses, and exome sequencing in Primary Ciliary Dyskinesia | Genetics not used as a diagnostic tool |
| Hjeij et al 2013           | Genetic testing for ARMC4 mutations in PCD                                                                                         | Genetics not used as a diagnostic tool |
| Horani et al 2013          | Genetic testing for CCDC65 mutations in patients normal US and hyperkinetic cilia                                                  | Genetics not used as a diagnostic tool |
| Horani et al 2013          | Genetic testing for LRRC6 mutation in PCD patients with dynein arm defects                                                         | Genetics not used as a diagnostic tool |
| Knowles et al 2013         | Exome Sequencing Identifies Mutations in CCDC114 as a Cause of Primary Ciliary Dyskinesia                                          | Genetics not used as a diagnostic tool |
| Knowles et al 2013         | genetic testing for SPAG1 mutations in PCD patients with defective ODA and IDA                                                     | Genetics not used as a diagnostic tool |
| Kott et al 2013            | Genetic testing for RSPH1 mutations in PCD patients with central-complex and radial-spoke defects                                  | Genetics not used as a diagnostic tool |
| Moore et al 2013           | Genetic testing for ZMYND10 in PCD patients                                                                                        | Genetics not used as a diagnostic tool |
| Onoufriadis et al 2013     | Genetic testing for CCDC114 in patients with ODA defects                                                                           | Genetics not used as a diagnostic tool |

|                        |                                                                                                                            |                                           |
|------------------------|----------------------------------------------------------------------------------------------------------------------------|-------------------------------------------|
| Tarkar et al 2013      | Genetic testing for DYX1C1 in PCD patients                                                                                 | Genetics not used as a diagnostic tool    |
| Wirschell et al 2013   | Genetic testing for CCDC164 in patients with PCD                                                                           | Genetics not used as a diagnostic tool    |
| Zariwala et al 2013    | Genetic testing for ZMYND10 and LRRC6 mutation in PCD patients                                                             | Genetics not used as a diagnostic tool    |
| Ben Khalifa et al 2014 | Genetic testing of patients with asthenozoospermia                                                                         | No PCD population, only asthenozoospermia |
| Hjeij et al 2014       | Genetic testing for CCDC151 mutations in PCD                                                                               | Genetics not used as a diagnostic tool    |
| Kim et al 2014         | The Role of molecular genetic analysis in Primary Ciliary Dyskinesia                                                       | Genetics not used as a diagnostic tool    |
| Knowles et al 2014     | Genetic testing of mutations in RSPH1 in PCD                                                                               | Genetics not used as a diagnostic tool    |
| Onoufriadis et al 2014 | Targeted NGS gene search for mutations in RSPH1 causing PCD                                                                | Genetics not used as a diagnostic tool    |
| Onoufriadis et al 2014 | Combined exome and whole-genome sequencing for testing mutations in ARMC4 in patients with defects in the outer dynein arm | Genetics not used as a diagnostic tool    |
| Shapiro et al 2014     | Genetic testing in patients with Situs Ambiguus and Heterotaxy                                                             | Genetics not used as a diagnostic tool    |
| Wallmeier et al 2014   | Mutations in CCNO in suspected PCD patients                                                                                | Genetics not used as a diagnostic tool    |
| Watson et al 2014      | Robust Diagnostic Genetic Testing Using Solution Capture Enrichment and a Novel Variant-Filtering Interface                | Genetics not used as a diagnostic tool    |
| Zhang et al 2014       | Genetic testing for DNAH5 mutations in one PCD family                                                                      | Genetics not used as a diagnostic tool    |
| Frommer et al 2015     | IF analysis and genetic testing for radial spoke defects                                                                   | Genetics not used as a diagnostic tool    |
| Olbrich et al 2015     | genetic testing for mutations in GAS8 in suspected PCD patients                                                            | Genetics not used as a diagnostic tool    |
| Kurkowiak et al 2016   | Genetic testing for ZMYND10 in PCD patients                                                                                | Genetics not used as a diagnostic tool    |
| Dougherty et al 2016   | Genetic testing for DNAH11 mutation in highly suspected PCD patients with normal US                                        | Genetics not used as a diagnostic tool    |

|                     |                                                                                                    |                                         |
|---------------------|----------------------------------------------------------------------------------------------------|-----------------------------------------|
| Jeanson et al 2015  | Genetic testing for RSPH3 mutations in patients with radial spoke defects                          | Genetics not used as a diagnostic tool  |
| Casey et al 2015    | Genetic heterogeneity for primary ciliary dyskinesia in the Irish Traveller population.            | Genetics not used as a diagnostic tool  |
| Djakow et al 2015   | Combination of sanger and next generation sequencing in diagnostics of primary ciliary dyskinesia. | Genetics not used as a diagnostic tool  |
| Fedick et al 2015   | Genetic testing in eight PCD genes in the Ashkenazi Jewish population.                             | Genetics not used as a diagnostic tool  |
| Imtiaz et al 2015   | Genetic testing for DNAH1 in PCD patients                                                          | Genetics not used as a diagnostic tool  |
| Lai et al 2016      | Gene editing of DNAH11 to restore cilia motility in PCD                                            | Genetics not used as a diagnostic tool  |
| Li et al 2016       | Exome sequencing analysis for ciliome mutations in heterotaxy patients. Genetic testing for DNAH6. | No PCD population, heterotaxy, genetics |
| Marshall et al 2015 | Whole-Exome Sequencing and Targeted Copy Number Analysis in Primary Ciliary Dyskinesia.            | Genetics not used as a diagnostic tool  |

Supplementary Table 8. Summary of Genetics studies excluded at full-text review stage with reason for exclusion.

# IF

| Publication                | Study design                                                                                                | Reason for exclusion/ comments                                     |
|----------------------------|-------------------------------------------------------------------------------------------------------------|--------------------------------------------------------------------|
| Antony et al 2013          | Genetic testing for CCDC39 and CCDC40 in PCD positive patients                                              | IF not used as a diagnostic tool                                   |
| Austin-Tse et al 2013      | Identification of C21orf59 in a PCD patient                                                                 | IF not used as a diagnostic tool                                   |
| Becker-Heck et al 2011     | Genetic testing for CCDC39 in PCD positive patients                                                         | IF not used as a diagnostic tool                                   |
| Ben Khalifa et al 2014     | Genetic testing of patients with asthenozoospermia                                                          | no definite diagnosis of PCD                                       |
| Bukowy-Bieryłło et al 2013 | RPGR genetic testing in patients with PCD and RP                                                            | IF not used as a diagnostic tool                                   |
| Fliegauf et al 2005        | Genetic testing for patients with ODA defects, control incl. CF and P with recurrent respiratory infections | IF not used as a diagnostic tool                                   |
| Hiej et al 2013            | Genetic testing for ARMC4 mutations in PCD patients with ODA defects                                        | IF not used as a diagnostic tool                                   |
| Hiej et al 2014            | Genetic testing for CCDC151 mutations in PCD                                                                | IF not used as a diagnostic tool                                   |
| Horani et al 2013          | Genetic testing for CCDC65 mutations in patients normal US and hyperkinetic cilia                           | If used to confirm genetic mutation                                |
| Horani et al 2012          | Whole-exome capture and sequencing identifies HEATR2 mutation as a cause of primary ciliary dyskinesia      | IF not used as a diagnostic tool                                   |
| Horani et al 2013          | Genetic testing for LRRC6 mutation in PCD patients with dynein arm defects                                  | IF not used as a diagnostic tool                                   |
| Hornef et al 2006          | Genetic testing for DNAH5 mutations in PCD patients with outer dynein arm defects                           | Not used as diagnostic test but as confirmation of genetic testing |
| Knowles et al 2012         | Genetic testing for Mutations of DNAH11 in patients with PCD with normal ciliary US                         | IF not used as a diagnostic tool                                   |
| Knowles et al 2013         | Genetic testing for SPAG1 mutations in PCD patients with defective ODA and IDA                              | IF not used as a diagnostic tool                                   |
| Kott et al 2012            | Genetic testing for LRRC6 mutations in PCD patients with outer and inner dynein arm defects                 | IF not used as a diagnostic tool                                   |
| Kott et al 2013            | Genetic testing for RSPH1 mutations in PCD patients                                                         | IF used to confirm genetic mutation                                |

|                        |                                                                                                                            |                                                     |
|------------------------|----------------------------------------------------------------------------------------------------------------------------|-----------------------------------------------------|
|                        | with central-complex and radial-spoke defects                                                                              |                                                     |
| Lee et al 2012         | CEP41 mutation in Joubert syndrome                                                                                         | Ciliopathy disease, no PCD                          |
| Loges et al 2009       | Genetic testing for LRRC50 mutations in PCD patients with dynein arm defects                                               | IF not used as a diagnostic tool                    |
| Loges et al 2008       | Genetic testing for DNAI2 mutation in PCD patients with ODA defects                                                        | IF not used as a diagnostic tool                    |
| Merveille et al 2011   | Genetic testing for CCDC39 in suspected PCD patients                                                                       | IF not used as a diagnostic tool                    |
| Mitchison et al 2012   | Genetic testing for DNAAF in PCD patients                                                                                  | IF not used as a diagnostic tool                    |
| Moore et al 2013       | Genetic testing for ZMYND10 in PCD patients                                                                                | IF not used as a diagnostic tool                    |
| Olbrich et al 2006     | DNAH5 testing for PCD patients                                                                                             | Not used as diagnostic test but as confirmation     |
| Olbrich 2012           | Genetic testing for HYDIN mutations                                                                                        | IF not used as a diagnostic tool                    |
| Omran et al 2008       | Genetic testing for KTU mutations in PCD patients                                                                          | IF not used as a diagnostic tool                    |
| Onoufriadis et al 2013 | Genetic testing for CCDC114 in patients with ODA defects                                                                   | IF used to confirm significance of genetic mutation |
| Onoufriadis et al 2014 | Targeted NGS gene search for mutations in RSPH1 causing PCD                                                                | IF used to confirm genetic mutation                 |
| Onoufriadis et al 2014 | Combined exome and whole-genome sequencing for testing mutations in ARMC4 in patients with defects in the outer dynein arm | IF not used as a diagnostic tool                    |
| Panizzi et al 2012     | Genetic testing for CCDC103 mutation in PCD patients                                                                       | IF not used as a diagnostic tool                    |
| Schwabe et al 2008     | Genetic testing for DNAH11 mutation in highly selected PCD patients with normal US                                         | IF not used as a diagnostic tool                    |
| Tarkar et al 2013      | Genetic testing for DYX1C1 in PCD patients                                                                                 | IF not used as a diagnostic tool                    |
| Wallmeier et al 2014   | Mutations in CCNO in suspected PCD patients                                                                                | IF used to confirm genetic mutation                 |
| Wirschell et al 2013   | Genetic testing for CCDC164 in patients with PCD                                                                           | IF not used as a diagnostic tool                    |
| Zariwala et al 2013    | genetic testing for ZMYND10 and LRRC6 mutation in PCD patients                                                             | IF not used as a diagnostic tool                    |
| Diggle et al 2014      | Genetic testing for HEATR2 mutations in PCD patients                                                                       | IF used to confirm genetic mutation                 |

|                    |                                                                                     |                                                                 |
|--------------------|-------------------------------------------------------------------------------------|-----------------------------------------------------------------|
| Frommer et al 2015 | IF analysis and genetic testing for radial spoke defects                            | Selective group, no control group, no complete diagnostic tests |
| Olbrich 2015       | genetic testing for mutations in GAS8 in suspected PCD patients                     | IF used to confirm genetic mutation                             |
| Kurkowiak 2016     | Genetic testing for ZMYND10 in PCD patients                                         | IF not used as a diagnostic tool                                |
| Dougherty 2016     | Genetic testing for DNAH11 mutation in highly suspected PCD patients with normal US | IF not used as a diagnostic tool                                |
| Jeanson 2015       | Genetic testing for RSPH3 mutations in patients with radial spoke defects           | IF used to confirm genetic mutation                             |

Supplementary Table 9. Immunofluorescence workgroup. Summary of studies excluded at full-text review stage with reason for exclusion.

## Summary of evidence

Data was extracted from manuscripts that fulfilled inclusion criteria for inclusion in the qualitative analysis, and was used to answer the questions regarding accuracy of each diagnostic test. The data is summarised in Supplementary Table 10. We did not identify any studies that fulfilled GRADE criteria for genetics nor IF and they are therefore not included in the table.

| Outcome | No of | Study | Factors that may decrease quality of evidence | Test accuracy |
|---------|-------|-------|-----------------------------------------------|---------------|
|---------|-------|-------|-----------------------------------------------|---------------|

|                                                                       |              | studies<br><br>(No of patients) | design                     | Risk of bias         | Indirectness         | Inconsistency | Imprecision | Publication bias | QoE             |
|-----------------------------------------------------------------------|--------------|---------------------------------|----------------------------|----------------------|----------------------|---------------|-------------|------------------|-----------------|
| Clinical Workgroup (All clinical features except situs abnormalities) |              |                                 |                            |                      |                      |               |             |                  |                 |
| Sens.                                                                 | See table 1  | 1 study<br>641 patients         | cohort type accuracy study | not serious          | serious <sup>1</sup> | not serious   | not serious | undetected       | ⊕⊕⊕<br>MODERATE |
| Spec.                                                                 | See table 1  |                                 |                            |                      |                      |               |             |                  |                 |
| Clinical Workgroup (situs abnormalities)                              |              |                                 |                            |                      |                      |               |             |                  |                 |
| Sens.                                                                 | See table 1  | 2 studies<br>1408 patients      | cohort type accuracy study | not serious          | serious <sup>1</sup> | not serious   | not serious | undetected       | ⊕⊕⊕<br>MODERATE |
| Spec.                                                                 | See table 1  |                                 |                            |                      |                      |               |             |                  |                 |
| Nasal Nitric Oxide                                                    |              |                                 |                            |                      |                      |               |             |                  |                 |
| Sens.                                                                 | 0.91 to 0.99 | 4 studies<br>588 patients       | cohort type accuracy study | not serious          | serious <sup>1</sup> | not serious   | not serious | undetected       | ⊕⊕⊕<br>MODERATE |
| Spec.                                                                 | 0.75 to 0.96 |                                 |                            |                      |                      |               |             |                  |                 |
| High Speed Video Microscopy                                           |              |                                 |                            |                      |                      |               |             |                  |                 |
| Sens.                                                                 | 0.97 to 1.0  | 2 studies<br>659 patients       | cohort type accuracy study | serious <sup>2</sup> | serious <sup>1</sup> | not serious   | not serious | undetected       | ⊕⊕<br>LOW       |
| Spec.                                                                 | 0.83 to 0.93 |                                 |                            |                      |                      |               |             |                  |                 |
| TEM                                                                   |              |                                 |                            |                      |                      |               |             |                  |                 |
| Sens.                                                                 | 0.71 to 1.0  | 11 studies                      | cohort                     | serious <sup>2</sup> | serious <sup>1</sup> | not serious   | not serious | undetected       | ⊕⊕              |

|       |             |               |                     |  |  |  |  |  |     |
|-------|-------------|---------------|---------------------|--|--|--|--|--|-----|
| Spec. | 0.92 to 1.0 | 3200 patients | type accuracy study |  |  |  |  |  | LOW |
|-------|-------------|---------------|---------------------|--|--|--|--|--|-----|

Supplementary Table 10. Summary of the assessments of the evidence and quality of data contributing to the recommendations. 1no direct patient outcomes assessed 2index test is included in the reference standard

Additional information regarding diagnostic testing.

Information relating to the clinical features associated with PCD and to genetics testing which could not be included in the main document is detailed below.

*In patients suspected of having PCD, which clinical features are associated with a diagnosis of PCD?*

We aimed to identify all original research papers that describe clinical features (symptoms, signs, results from non-specific examinations e.g. imaging) in patients referred for evaluation of possible PCD, and where a final diagnosis was made using a standard considered appropriate by the Task Force panel. We excluded case-control studies for the quantitative synthesis, because these usually include only very typical patients, and healthy controls or patients suffering from other lung diseases. Results from comparison from these two groups are not useful for distinguishing PCD patients from patients with other conditions within those referred for evaluation of possible PCD.

However, we considered case-control studies for the qualitative assessment. We also excluded studies, in which symptoms were assessed once testing had started, to avoid differential reporting bias by physicians aware of the final diagnosis.

We identified 1269 studies, of which eight met the inclusion criteria for qualitative assessment and two for quantitative synthesis (Supplementary Fig 1a). We excluded publications based for the following reasons: studies that were not topic related (n=514), did not describe any clinical manifestations (n=302), not original studies (n=159), case reports or case series without a comparison group (n=223) and studies describing other rare ciliary syndromes (n=14). Additionally we excluded 5 conference abstracts which did not contain sufficient information. After assessing the full-text of the remaining 52 studies, we



excluded 44 for not fulfilling the inclusion criteria. These studies are summarised in Supplementary Table 3.

From the eight eligible studies, six were excluded from the quantitative analysis because they did not fit the inclusion criteria. They either included a highly selected study population introducing bias (e.g. only patients with abnormal cilia structure or patients who were already diagnosed with PCD) or they were case-control studies (e.g. comparing PCD to healthy volunteers).

The two studies by Behan et al(3) and Shapiro et al(4) were included in the quantitative analysis, including a total of 1408 patients and they are summarised in Table 1.

Behan et al analysed data from 868 consecutive paediatric and adult patients referred to the University Hospital of Southampton between 2007 and 2013. Patients with inconclusive or incomplete diagnostic results (227) were excluded, leaving 641 for the analysis. All patient data were collected through a proforma completed by a clinician prior to the diagnostic testing.

Shapiro et al analysed data from 767 consecutive paediatric and adult patients referred to the Genetic Diseases of Mucociliary Clearance Consortium between May 2006 and September 2012. Information on situs status was determined by physicians at local consortium sites through review of radiology, surgery, and cardiology reports and radiology images from participant medical records. Patients were divided into 3 situs categories: situs solitus, situs inversus and situs ambiguous (including heterotaxy).

#### *Genes associated with PCD*

One third of genes identified to date encode outer dynein arm (ODA) components (dynein, axonemal, intermediate chain 1 (DNAI1) and 2 (DNAI2); heavy chain 5 (DNAH5) and 11 (DNAH11); thioredoxin domain containing 3 (NME8/TXNDC3) and DNAL1) [15–22] or components of the ODA docking complex machinery, necessary for the binding of ODAs to axonemal microtubules (Coiled-Coil Domain-Containing Protein 114 (CCDC114), CCDC151 and Armadillo Repeat-Containing Protein 4 (ARMC4))[23–26].

Mutations in genes encoding the Dynein Axonemal Assembly Factors 1-5 that are required for cytoplasmic pre-assembly of axonemal dynein components cause absence of inner and outer dynein arms; DNAAF1/LRRC50, DNAAF2/KTU, DNAAF3, DYX1C1/DNAAF4 (Dyslexia Susceptibility 1 Candidate 1 ), DNAAF5/HEATR2 (Heat Repeat-Containing Protein 2) are responsible for the absence of outer and inner dynein arms. Mutations in *LRRC6* (Leucine Rich Repeat Containing 6), *CCDC103* (Coiled-Coil Domain-Containing Protein103), *ZMYND10* (Zinc Finger Mynd Domain-Containing Protein 10), *SPAG1* (Sperm-Associated Antigen 1) and *C21orf59* (Chromosome 21 Open Reading Frame 59)[27–37] have also been associated to the absence of both dynein arms.

Mutations in the genes encoding the radial spoke proteins (RSPH1, RSPH3, RSPH4A, RSPH9), as well as the central pair apparatus associated protein HYDIN have been reported in PCD patients [38–43]. PCD individuals carrying mutations in those genes do not show any laterality defects such as *situs inversus*. Most of their respiratory cilia show normal ultrastructure with central-microtubular-pair abnormalities in a minority of cilia. Cilia of those patients are motile but exhibit subtle abnormalities of their beat pattern [38, 39, 41] which might be missed.

Mutations in genes encoding the ruler proteins CCDC39 and CCDC40 result in severe microtubular disorganisation and IDA defects as well as randomization of left/right asymmetry[44–46]. Both proteins are responsible for the attachment of the nexin links-dynein regulatory complex (nDRC) and inner dynein arms (IDAs) and to the proper spacing of the radial spokes [47].

However, mutations in genes encoding nDRC components such as DRC1/CCDC164, CCDC65 as well as GAS8/DRC4[37, 48, 49] cause PCD with a low percentage of cilia showing axonemal disorganisation and subtle ciliary beating defects detectable by high-speed video microscopy[49] which might be easily missed. Interestingly, so far all reported PCD individuals with isolated nDRC defects showed no laterality defects.

Mutations in two genes, *CCNO* and *MCIDAS*, have been identified as a cause of a PCD-like syndrome referred to as reduced generation of multiple motile cilia (RGMC) with a complete absence or severely reduced numbers of cilia by TEM of respiratory epithelial cells causing impaired mucociliary clearance [50–52]. This condition is somewhat reminiscent of ciliary

aplasia described in the 1980s, especially in cases with complete absence of cilia [53, 54].

To date situs has always been normal in patients with RGMC.

In a minority of cases, X-linked inheritance has been implicated. Retinitis pigmentosa, sensory hearing deficits and PCD have been associated with mutations in the retinitis pigmentosa guanosine triphosphatase regulator gene (*RPGR*), essential for photoreceptor maintenance and viability. In addition, Budny *et al.* described a single family with a novel syndrome that is caused by oral-facial-digital type 1 syndrome gene (*OFD1*) mutations, and characterised by X-linked recessive mental retardation, macrocephaly and PCD [55].

#### Molecular approaches for genetic testing in PCD

1/ **Sanger sequencing** of all coding regions and flanking intronic regions, ideally targeting to the genes responsible for a specific ultrastructural defect. The numerous genes and the large size of many of them create a problem. However, the yield is good in some cases e.g. *CCDC39* and *CCDC40* explain almost all cases with microtubular disorganization with absence of IDA [46, 56]. Sanger sequencing does not detect deletions encompassing a whole exon or several exons in the heterozygous state. It does not detect homozygous or heterozygous intragenic duplications regarding one or more exons.

2/ **Targeted Next Generation Sequencing (NGS)** of all coding regions and flanking intronic regions. Like Sanger sequencing, this technique can detect point mutations and small indels. This technique can detect insertions/deletions of one or several exons, but this need a specific sensitivity assessment. The coverage and depth may not be optimal for some exons, which should be stated in the molecular report (or the gap should be covered by another sequencing approach).

3/ **Whole exome sequencing**. Coverage and depth are usually lower than targeted NGS. The depth is usually not sufficient to detect deletions or duplications of more than one exon.

4/ **Targeted copy number analysis** consists of semi-quantitative qPCR to characterize large indels that have already been reported[57].

5/ **Whole genome copy number analysis** (SNP array) is a second line technique to detect large rearrangements. Its sensitivity is low for intragenic deletions and relies on the probe density in each region.

6/ **Transcript analysis** on airway epithelial cells from the patient (in patients in whom a single heterozygous mutation has been identified in a relevant gene). It can detect deep intronic mutations (such as those creating pseudo-exons) that are missed by the above mentioned techniques.

The percentage of confirmed PCD with no identified mutation is currently between 25 and 50 % [57–59]. The mutations that are currently missed include:

- deep intronic mutations (except if transcript analysis is performed in specific cases) and mutations in regulatory regions (e.g. promoter)
- heterozygous deletions/insertions encompassing at least one whole exon (for Sanger and exome analysis); they can be detected by targeted NGS analysis and in some cases with targeted CNV analysis
- homozygous duplications of at least one exon (by Sanger and exome); they can be identify by targeted NGS
- homozygous deletions (by exome); they can be detected by Sanger and targeted NGS.
- cases that are not investigated because they are atypical.

The majority of mutations are nonsense or frameshift mutations or result in abnormal splicing, while missense mutations have been reported in a minority of cases. Rare variants in sequence such as missense mutations that change a single amino acid remain difficult to attribute to disease. In order to rate possible pathogenic consequences, the following elements should be considered: evolutionary conservation; allele frequency in control databases such as ExAC (deleterious effect is excluded when the frequency is high); in silico or in vitro assessment of a potential effect on splicing (also true for synonymous variations); functional assessment (eg. Zebrafish, Xenopus); localization of the amino acid in a functional

domain (lower level of evidence); previous description in other PCD patients (lower level of evidence).

## Consensus statement for diagnostic outcome

There were four iterative rounds of Delphi Survey. The results of votes are presented in Supplementary Table 11.

Supplementary Table 11: Summary results of four rounds of Delphi Survey (a-d), with voting to reach a consensus for diagnostic outcomes. Consensus was defined by >80% of respondents agreeing or disagreeing a statement (shaded cells)

| a) <u>Survey 1</u> (respondents n=22)                                                                                                                                                          | Strongly Agree % |
|------------------------------------------------------------------------------------------------------------------------------------------------------------------------------------------------|------------------|
| The following test results can be used to CONFIRM a diagnosis of PCD in isolation if conducted in a specialist centre:                                                                         |                  |
| Transmission electron microscopy (hallmark; once)                                                                                                                                              | 38               |
| Bi-allelic mutations in PCD causing gene                                                                                                                                                       | 52               |
| Nasal nitric oxide (persistently abnormal x3)5                                                                                                                                                 | 14               |
| High speed video analysis (pattern and frequency) once                                                                                                                                         | 5                |
| High speed video analysis (pattern and frequency) (consistently abnormal x3)                                                                                                                   | 29               |
| High speed video analysis (pattern and frequency)                                                                                                                                              | 5                |
| Immunofluorescence (hallmark; PCD once)                                                                                                                                                        | 5                |
|                                                                                                                                                                                                |                  |
| The following test results can be used in isolation (i.e. results of the single diagnostic test) to EXCLUDE a diagnosis of PCD if conducted in a specialist center using local reference data: |                  |
| Transmission electron microscopy normal                                                                                                                                                        | 5                |
| Immunofluorescence normal                                                                                                                                                                      | 0                |
| No bi-allelic mutations in PCD causing gene                                                                                                                                                    | 5                |
| Nasal nitric oxide normal or high                                                                                                                                                              | 0                |
| High speed video analysis (entirely normal CBF and CBP)                                                                                                                                        | 18               |
| High speed video analysis entirely normal following culture (suspension or ALI) if original sample was equivocal                                                                               | 27               |

| b) <u>Survey 2</u> (respondents n=17)                                                           | Strongly Agree % |
|-------------------------------------------------------------------------------------------------|------------------|
| In a patient with a typical history a diagnosis of PCD is confirmed with the following results: |                  |
| Very low nNO PLUS hallmark HSVM consistently on two occasions                                   | 12               |

|                                                                                                                                                                                                           |    |
|-----------------------------------------------------------------------------------------------------------------------------------------------------------------------------------------------------------|----|
| Very low nNO PLUS hallmark HSVM consistently on three occasions                                                                                                                                           | 47 |
| Very low nNO PLUS hallmark HSVM following cell culture                                                                                                                                                    | 35 |
| Very low nNO PLUS hallmark IF                                                                                                                                                                             | 6  |
| HSVM consistently hallmark abnormal on three occasions                                                                                                                                                    | 0  |
| HSVM hallmark abnormal following cell culture                                                                                                                                                             | 6  |
| Where there is only modest clinical suspicion of a diagnosis of PCD and diagnosis can be EXCLUDED:                                                                                                        |    |
| High/ normal nNO AND HSVMA normal                                                                                                                                                                         | 18 |
| High/ normal nNO AND HSVM normal following cell culture                                                                                                                                                   | 24 |
| High/ normal nNO AND TEM normal                                                                                                                                                                           | 6  |
| High/ normal nNO AND IF normal                                                                                                                                                                            | 0  |
| High/ normal nNO AND genetics normal                                                                                                                                                                      | 6  |
| Genetics and TEM normal                                                                                                                                                                                   | 6  |
| Entirely normal HSVM following culture                                                                                                                                                                    | 12 |
| Entirely normal HSVM                                                                                                                                                                                      | 6  |
| In patients where an expert PCD clinician has a strong suspicion that the diagnosis is positive based on the history (e.g. PICADAR) a positive diagnosis can be excluded with the following test results: |    |
| High/ normal nNO AND HSVMA normal                                                                                                                                                                         | 0  |
| High/ normal nNO AND HSVM normal following cell culture                                                                                                                                                   | 0  |
| High/ normal nNO AND TEM normal                                                                                                                                                                           | 0  |
| High/ normal nNO AND IF normal                                                                                                                                                                            | 0  |
| High/ normal nNO AND genetics normal                                                                                                                                                                      | 0  |
| Genetics and TEM normal                                                                                                                                                                                   | 0  |
| Entirely normal HSVM following culture                                                                                                                                                                    | 0  |
| Entirely normal HSVM                                                                                                                                                                                      | 0  |

|                                                                                                                                                                                                                  |                  |
|------------------------------------------------------------------------------------------------------------------------------------------------------------------------------------------------------------------|------------------|
| <u>c)</u> Survey 3 (respondents n=15)                                                                                                                                                                            | Strongly Agree % |
| Patients with a clinical history compatible with PCD should have access to a range of diagnostic tests which should include                                                                                      |                  |
| nNo                                                                                                                                                                                                              | 87               |
| HSVM                                                                                                                                                                                                             | 87               |
| TEM                                                                                                                                                                                                              | 93               |
| Genetics                                                                                                                                                                                                         | 40               |
| IF                                                                                                                                                                                                               | 7                |
| Regarding the diagnosis of PCD                                                                                                                                                                                   |                  |
| Tests should be conducted in laboratories with expertise in PCD diagnostics                                                                                                                                      | 87               |
| Test results should be interpreted by specialists with expertise in PCD diagnostics                                                                                                                              | 87               |
| Test results should be reported to patients and their non-specialist carers by a PCD specialist clinician                                                                                                        | 73               |
| Diagnostic tests for PCD are currently imperfect. As our understanding and techniques for PCD diagnosis advance patients should be called back and offered repeated testing to confirm or exclude the diagnosis. | 73               |
| A diagnosis of PCD is highly likely if the patient has a compatible history and the test results include:                                                                                                        |                  |

|                                                                                                                                                                                                                                                                                                                                                           |    |
|-----------------------------------------------------------------------------------------------------------------------------------------------------------------------------------------------------------------------------------------------------------------------------------------------------------------------------------------------------------|----|
|                                                                                                                                                                                                                                                                                                                                                           |    |
| Very low nNO PLUS abnormal HSVMA consistently on two occasions                                                                                                                                                                                                                                                                                            | 20 |
| Very low nNO PLUS abnormal HSVMA consistently on three occasions                                                                                                                                                                                                                                                                                          | 53 |
| Very low nNO PLUS abnormal HSVMA following cell culture                                                                                                                                                                                                                                                                                                   | 53 |
| Very low nNO PLUS abnormal IF                                                                                                                                                                                                                                                                                                                             | 13 |
| HSVMA consistently abnormal on three occasions                                                                                                                                                                                                                                                                                                            | 13 |
| HSVMA abnormal following cell culture                                                                                                                                                                                                                                                                                                                     | 20 |
| Abnormal HSVMA twice                                                                                                                                                                                                                                                                                                                                      | 0  |
| Abnormal IF                                                                                                                                                                                                                                                                                                                                               | 7  |
| Very low nNO                                                                                                                                                                                                                                                                                                                                              | 0  |
| Very strong clinical history e.g. Kartagener's syndrome, PICADAR >10 but no access to diagnostic tests                                                                                                                                                                                                                                                    | 7  |
| If a diagnosis is considered highly likely but can not be definitively confirmed the following statements are true:                                                                                                                                                                                                                                       |    |
| Patients should have other causes for their symptoms excluded                                                                                                                                                                                                                                                                                             | 80 |
| Patients should be managed as if they have PCD until the diagnosis can be definitively confirmed or excluded.                                                                                                                                                                                                                                             | 53 |
| Patients should be told that the diagnosis is likely but not definite                                                                                                                                                                                                                                                                                     | 73 |
| Patients should be invited to have further tests as new tests become available or refinements to existing tests occur.                                                                                                                                                                                                                                    | 93 |
| Diagnosis extremely unlikely; the following statements are true:                                                                                                                                                                                                                                                                                          |    |
| Current diagnostic tests for PCD are imperfect                                                                                                                                                                                                                                                                                                            | 67 |
| As our understanding of the disease improved patients currently considered highly unlikely might be appropriate for further testing if new diagnostic tests become available                                                                                                                                                                              | 40 |
| All patients where the diagnosis is considered "highly unlikely" should be counselled that current diagnostic testing is imperfect                                                                                                                                                                                                                        | 33 |
| The diagnosis of PCD is unlikely in the following circumstances. Given the evidence from the TF review it is acceptable to counsel the patient that a diagnosis is extremely unlikely and stop further investigations until improved diagnostic options are available, unless the diagnosis is considered extremely likely based on the clinical history. |    |
| High/ normal nNO AND HSVMA normal                                                                                                                                                                                                                                                                                                                         | 40 |
| High/ normal nNO AND HSVMA normal following cell culture                                                                                                                                                                                                                                                                                                  | 47 |
| High/ normal nNO AND TEM normal                                                                                                                                                                                                                                                                                                                           | 13 |
| High/ normal nNO AND IF normal                                                                                                                                                                                                                                                                                                                            | 7  |
| High/ normal nNO AND genetics normal                                                                                                                                                                                                                                                                                                                      | 7  |
| Genetics and TEM normal                                                                                                                                                                                                                                                                                                                                   | 13 |
| High/ normal nNO AND HSVMA normal                                                                                                                                                                                                                                                                                                                         | 13 |
| High/ normal nNO AND HSVMA normal following cell culture                                                                                                                                                                                                                                                                                                  | 20 |
| High/ normal nNO AND TEM                                                                                                                                                                                                                                                                                                                                  | 7  |
| High/ normal nNO AND IF normal                                                                                                                                                                                                                                                                                                                            | 7  |
| High/ normal nNO AND genetics normal                                                                                                                                                                                                                                                                                                                      | 7  |
| Genetics and TEM normal                                                                                                                                                                                                                                                                                                                                   | 0  |

|                                                                                                                                                                                                                                                                                                                                                         |                  |
|---------------------------------------------------------------------------------------------------------------------------------------------------------------------------------------------------------------------------------------------------------------------------------------------------------------------------------------------------------|------------------|
| d) Survey 4 (respondents n=19)                                                                                                                                                                                                                                                                                                                          | Strongly Agree % |
| The diagnosis of PCD is unlikely in the following circumstance. Given the evidence from the TF review it is acceptable to counsel the patient that a diagnosis is extremely unlikely and stop further investigations until improved diagnostic options are available unless the diagnosis is considered extremely likely based on the clinical history. |                  |
| High/ normal nNO Plus normal TEM plus normal genetics                                                                                                                                                                                                                                                                                                   | 32               |
| If diagnostic tests are inconclusive:                                                                                                                                                                                                                                                                                                                   |                  |
| The decision to repeat tests and/ or conduct different tests should be made by a specialist with expertise in PCD diagnostics.                                                                                                                                                                                                                          | 83               |
| Once all tests are conducted, if still inconclusive the patient should be considered 'possible PCD'                                                                                                                                                                                                                                                     | 11               |
| Possible PCD patients should have other causes for their symptoms excluded                                                                                                                                                                                                                                                                              | 72               |
| Possible PCD patients should be treated as if they have PCD until the diagnosis is confirmed or excluded.                                                                                                                                                                                                                                               | 39               |



## References

1. Walker WT, Young A, Bennett M, Guy M, Carroll M, Fleming J, Conway J, Lucas JS. Pulmonary radioaerosol mucociliary clearance in primary ciliary dyskinesia. *Eur. Respir. J.* 2014; 2014 Aug;44(2):533-5..
2. Jorissen M, Willems T, Van der Schueren B, Verbeken E, De Boeck K. Ultrastructural expression of primary ciliary dyskinesia after ciliogenesis in culture. *Acta Otorhinolaryngol. Belg.* 2000; 54: 343–356.
3. Hirst RA, Jackson CL, Coles JL, Williams G, Rutman A, Goggin PM, Adam EC, Page A, Evans HJ, Lackie PM, O’Callaghan C, Lucas JS. Culture of Primary Ciliary Dyskinesia Epithelial Cells at Air-Liquid Interface Can Alter Ciliary Phenotype but Remains a Robust and Informative Diagnostic Aid. *PLoS One* 2014; 9: e89675.
4. Nyilas S, Schlegtendal A, Yammine S, Casaulta C, Latzin P, Koerner-Rettberg C. Further evidence for an association between LCI and FEV1 in patients with PCD. *Thorax* 2015; 70: 896.
5. Green K, Ejlersen JS, Madsen A, Buchvald FF, Kongstad T, Kobbernagel H, Gustafsson PM, Nielsen KG. Abbreviation modalities of nitrogen multiple-breath washout tests in school children with obstructed lung disease. *Pediatr. Pulmonol.* 2016; Jun;51(6):624-32.
6. Maglione M, Bush A, Montella S, Mollica C, Manna A, Esposito A, Santamaria F. Progression of lung disease in primary ciliary dyskinesia: is spirometry less accurate than CT? *Pediatr. Pulmonol.* 2012; 47: 498–504.
7. Irving SJ, Ives A, Davies G, Donovan J, Edey AJ, Gill SS, Nair A, Saunders C, Wijesekera NT, Alton EFWF, Hansell D, Hogg C, Davies JC, Bush A. Lung clearance index and high-resolution computed tomography scores in primary ciliary dyskinesia. *Am. J. Respir. Crit. Care Med.* 2013; 188: 545–549.
8. Strippoli M-PF, Frischer T, Barbato A, Snijders D, Maurer E, Lucas JSA, Eber E, Karadag

- B, Pohunek P, Zivkovic Z, Escribano A, O'Callaghan C, Bush A, Kuehni CE. Management of primary ciliary dyskinesia in European children: recommendations and clinical practice. *Eur. Respir. J.* 2012; 39: 1482–1491.
9. Lucas JS, Behan L, Dunn Galvin A, Alpern A, Morris AM, Carroll MP, Knowles MR, Leigh MW, Quittner AL. A quality-of-life measure for adults with primary ciliary dyskinesia: QOL-PCD. *Eur. Respir. J.* 2015; 46: 375–383.
  10. Behan L, Dunn G, Rubbo B, Masefield S, Copeland F, Manion M, Rindlisbacher B, Redfern B, Lucas JSA. Diagnosing primary ciliary dyskinesia; an international patient perspective. *Eur Respir J* 2016; In Press.
  11. Whiting PF, Rutjes AWS, Westwood ME, Mallett S, Deeks JJ, Reitsma JB, Leeflang MMG, Sterne JAC, Bossuyt PMM. QUADAS-2: a revised tool for the quality assessment of diagnostic accuracy studies. *Ann. Intern. Med.* 2011; 155: 529–536.
  12. Guyatt G, Oxman AD, Akl EA, Kunz R, Vist G, Brozek J, Norris S, Falck-Ytter Y, Glasziou P, DeBeer H, Jaeschke R, Rind D, Meerpohl J, Dahm P, Schünemann HJ. GRADE guidelines: 1. Introduction-GRADE evidence profiles and summary of findings tables. *J. Clin. Epidemiol.* 2011; 64: 383–394.
  13. Balshem H, Helfand M, Schünemann HJ, Oxman AD, Kunz R, Brozek J, Vist GE, Falck-Ytter Y, Meerpohl J, Norris S, Guyatt GH. GRADE guidelines: 3. Rating the quality of evidence. *J. Clin. Epidemiol.* 2011; 64: 401–406.
  14. Andrews JC, Schünemann HJ, Oxman AD, Pottie K, Meerpohl JJ, Coello PA, Rind D, Montori VM, Brito JP, Norris S, Elbarbary M, Post P, Nasser M, Shukla V, Jaeschke R, Brozek J, Djulbegovic B, Guyatt G. GRADE guidelines: 15. Going from evidence to recommendation-determinants of a recommendation's direction and strength. *J. Clin. Epidemiol.* 2013; 66: 726–735.
  15. Pennarun G, Escudier E, Chapelin C, Bridoux AM, Cacheux V, Roger G, Clément A, Goossens M, Amselem S, Duriez B. Loss-of-function mutations in a human gene related to *Chlamydomonas reinhardtii* dynein IC78 result in primary ciliary dyskinesia. *Am. J. Hum. Genet.* 1999; 65: 1508–1519.

16. Loges NT, Olbrich H, Fenske L, Mussaffi H, Horvath J, Fliegauf M, Kuhl H, Baktai G, Peterffy E, Chodhari R, Chung EMK, Rutman A, O'Callaghan C, Blau H, Tiszlavicz L, Voelkel K, Witt M, Ziętkiewicz E, Neesen J, Reinhardt R, Mitchison HM, Omran H. DNAI2 Mutations Cause Primary Ciliary Dyskinesia with Defects in the Outer Dynein Arm. *Am. J. Hum. Genet.* 2008; 83: 547–558.
17. Olbrich H, Häffner K, Kispert A, Völkel A, Volz A, Sasmaz G, Reinhardt R, Hennig S, Lehrach H, Konietzko N, Zariwala M, Noone PG, Knowles M, Mitchison HM, Meeks M, Chung EMK, Hildebrandt F, Sudbrak R, Omran H. Mutations in DNAH5 cause primary ciliary dyskinesia and randomization of left-right asymmetry. *Nat. Genet.* Nature Publishing Group; 2002; 30: 143–144.
18. Schwabe GC, Hoffmann K, Loges NT, Birker D, Rossier C, de Santi MM, Olbrich H, Fliegauf M, Faily M, Liebers U, Collura M, Gaedicke G, Mundlos S, Wahn U, Blouin J-L, Niggemann B, Omran H, Antonarakis SE, Bartoloni L. Primary ciliary dyskinesia associated with normal axoneme ultrastructure is caused by DNAH11 mutations. *Hum. Mutat.* 2008; 29: 289–298.
19. Dougherty GW, Loges NT, Klinkenbusch JA, Olbrich H, Pennekamp P, Menchen T, Raidt J, Wallmeier J, Werner C, Westermann C, Ruckert C, Mirra V, Hjeij R, Memari Y, Durbin R, Kolb-Kokocinski A, Praveen K, Kashef MA, Kashef S, Eghtedari F, Häffner K, Valmari P, Baktai G, Aviram M, Bentur L, Amirav I, Davis EE, Katsanis N, Brueckner M, Shaposhnykov A, et al. DNAH11 Localization in the Proximal Region of Respiratory Cilia Defines Distinct Outer Dynein Arm Complexes. *Am. J. Respir. Cell Mol. Biol.* 2016; [Epub ahead of print] PubMed PMID: 26909801.
20. Bartoloni L, Blouin J-L, Pan Y, Gehrig C, Maiti AK, Scamuffa N, Rossier C, Jorissen M, Armengot M, Meeks M, Mitchison HM, Chung EMK, Delozier-Blanchet CD, Craigen WJ, Antonarakis SE. Mutations in the DNAH11 (axonemal heavy chain dynein type 11) gene cause one form of situs inversus totalis and most likely primary ciliary dyskinesia. *Proc. Natl. Acad. Sci. U. S. A.* 2002; 99: 10282–10286.
21. Duriez B, Duquesnoy P, Escudier E, Bridoux A-M, Escalier D, Rayet I, Marcos E, Vojtek A-M, Bercher J-F, Amselem S. A common variant in combination with a nonsense

- mutation in a member of the thioredoxin family causes primary ciliary dyskinesia. *Proc. Natl. Acad. Sci. U. S. A.* 2007; 104: 3336–3341.
22. Mazor M, Alkrinawi S, Chalifa-Caspi V, Manor E, Sheffield VC, Aviram M, Parvari R. Primary ciliary dyskinesia caused by homozygous mutation in DNAL1, encoding dynein light chain 1. *Am. J. Hum. Genet.* 2011; 88: 599–607.
  23. Onoufriadis A, Paff T, Antony D, Shoemark A, Micha D, Kuyt B, Schmidts M, Petridi S, Dankert-Roelse JE, Haarman EG, Daniels JMA, Emes RD, Wilson R, Hogg C, Scambler PJ, Chung EMK, Pals G, Mitchison HM. Splice-site mutations in the axonemal outer dynein arm docking complex gene CCDC114 cause primary ciliary dyskinesia. *Am. J. Hum. Genet.* 2013; 92: 88–98.
  24. Knowles MR, Leigh MW, Ostrowski LE, Huang L, Carson JL, Hazucha MJ, Yin W, Berg JS, Davis SD, Dell SD, Ferkol TW, Rosenfeld M, Sagel SD, Milla CE, Olivier KN, Turner EH, Lewis AP, Bamshad MJ, Nickerson DA, Shendure J, Zariwala MA. Exome sequencing identifies mutations in CCDC114 as a cause of primary ciliary dyskinesia. *Am. J. Hum. Genet.* 2013; 92: 99–106.
  25. Hjeij R, Onoufriadis A, Watson CM, Slagle CE, Klena NT, Dougherty GW, Kurkowiak M, Loges NT, Diggle CP, Morante NFC, Gabriel GC, Lemke KL, Li Y, Pennekamp P, Menchen T, Konert F, Marthin JK, Mans DA, Letteboer SJF, Werner C, Burgoyne T, Westermann C, Rutman A, Carr IM, O’Callaghan C, Moya E, Chung EMK, Sheridan E, Nielsen KG, Roepman R, et al. CCDC151 mutations cause primary ciliary dyskinesia by disruption of the outer dynein arm docking complex formation. *Am. J. Hum. Genet.* 2014; 95: 257–274.
  26. Hjeij R, Lindstrand A, Francis R, Zariwala MA, Liu X, Li Y, Damerla R, Dougherty GW, Abouhamed M, Olbrich H, Loges NT, Pennekamp P, Davis EE, Carvalho CMB, Pehlivan D, Werner C, Raidt J, Köhler G, Häffner K, Reyes-Mugica M, Lupski JR, Leigh MW, Rosenfeld M, Morgan LC, Knowles MR, Lo CW, Katsanis N, Omran H. ARMC4 mutations cause primary ciliary dyskinesia with randomization of left/right body asymmetry. *Am. J. Hum. Genet.* 2013; 93: 357–367.
  27. Loges NT, Olbrich H, Becker-Heck A, Häffner K, Heer A, Reinhard C, Schmidts M,

- Kispert A, Zariwala MA, Leigh MW, Knowles MR, Zentgraf H, Seithe H, Nürnberg G, Nürnberg P, Reinhardt R, Omran H. Deletions and Point Mutations of LRRC50 Cause Primary Ciliary Dyskinesia Due to Dynein Arm Defects. *Am. J. Hum. Genet.* 2009; 85: 883–889.
28. Duquesnoy P, Escudier E, Vincensini L, Freshour J, Bridoux A-M, Coste A, Deschildre A, de Blic J, Legendre M, Montantin G, Tenreiro H, Vojtek A-M, Loussert C, Clément A, Escalier D, Bastin P, Mitchell DR, Amselem S. Loss-of-Function Mutations in the Human Ortholog of *Chlamydomonas reinhardtii* ODA7 Disrupt Dynein Arm Assembly and Cause Primary Ciliary Dyskinesia. *Am. J. Hum. Genet.* 2009; 85: 890–896.
29. Omran H, Kobayashi D, Olbrich H, Tsukahara T, Loges NT, Hagiwara H, Zhang Q, Leblond G, O'Toole E, Hara C, Mizuno H, Kawano H, Fliegauf M, Yagi T, Koshida S, Miyawaki A, Zentgraf H, Seithe H, Reinhardt R, Watanabe Y, Kamiya R, Mitchell DR, Takeda H. Ktu/PF13 is required for cytoplasmic pre-assembly of axonemal dyneins. *Nature* 2008; 456: 611–616.
30. Mitchison HM, Schmidts M, Loges NT, Freshour J, Dritsoula A, Hirst RA, O'Callaghan C, Blau H, Al Dabbagh M, Olbrich H, Beales PL, Yagi T, Mussaffi H, Chung EMK, Omran H, Mitchell DR. Mutations in axonemal dynein assembly factor DNAAF3 cause primary ciliary dyskinesia. *Nat. Genet.* 2012; 44: 381–389, S1–S2.
31. Tarkar A, Loges NT, Slagle CE, Francis R, Dougherty GW, Tamayo J V, Shook B, Cantino M, Schwartz D, Jahnke C, Olbrich H, Werner C, Raidt J, Pennekamp P, Abouhamed M, Hjeij R, Köhler G, Griesse M, Li Y, Lemke K, Klena N, Liu X, Gabriel G, Tobita K, Jaspers M, Morgan LC, Shapiro AJ, Letteboer SJF, Mans DA, Carson JL, et al. DYX1C1 is required for axonemal dynein assembly and ciliary motility. *Nat. Genet.* 2013; 45: 995–1003.
32. Horani A, Druley TE, Zariwala MA, Patel AC, Levinson BT, Van Arendonk LG, Thornton KC, Giacalone JC, Albee AJ, Wilson KS, Turner EH, Nickerson DA, Shendure J, Bayly P V, Leigh MW, Knowles MR, Brody SL, Dutcher SK, Ferkol TW. Whole-exome capture and sequencing identifies HEATR2 mutation as a cause of primary ciliary dyskinesia. *Am. J. Hum. Genet.* 2012; 91: 685–693.

33. Kott E, Duquesnoy P, Copin B, Legendre M, Dastot-Le Moal F, Montantin G, Jeanson L, Tamalet A, Papon J-F, Siffroi J-P, Rives N, Mitchell V, de Blic J, Coste A, Clement A, Escalier D, Touré A, Escudier E, Amselem S. Loss-of-function mutations in LRRC6, a gene essential for proper axonemal assembly of inner and outer dynein arms, cause primary ciliary dyskinesia. *Am. J. Hum. Genet.* 2012; 91: 958–964.
34. Panizzi JR, Becker-Heck A, Castleman VH, Al-Mutairi DA, Liu Y, Loges NT, Pathak N, Austin-Tse C, Sheridan E, Schmidts M, Olbrich H, Werner C, Häffner K, Hellman N, Chodhari R, Gupta A, Kramer-Zucker A, Olale F, Burdine RD, Schier AF, O’Callaghan C, Chung EMK, Reinhardt R, Mitchison HM, King SM, Omran H, Drummond IA. CCDC103 mutations cause primary ciliary dyskinesia by disrupting assembly of ciliary dynein arms. *Nat. Genet.* 2012; 44: 714–719.
35. Zariwala MA, Gee HY, Kurkowiak M, Al-Mutairi DA, Leigh MW, Hurd TW, Hjeij R, Dell SD, Chaki M, Dougherty GW, Adan M, Spear PC, Esteve-Rudd J, Loges NT, Rosenfeld M, Diaz KA, Olbrich H, Wolf WE, Sheridan E, Batten TFC, Halbritter J, Porath JD, Kohl S, Lovric S, Hwang D-Y, Pittman JE, Burns KA, Ferkol TW, Sagel SD, Olivier KN, et al. ZMYND10 is mutated in primary ciliary dyskinesia and interacts with LRRC6. *Am. J. Hum. Genet.* 2013; 93: 336–345.
36. Knowles MR, Ostrowski LE, Loges NT, Hurd T, Leigh MW, Huang L, Wolf WE, Carson JL, Hazucha MJ, Yin W, Davis SD, Dell SD, Ferkol TW, Sagel SD, Olivier KN, Jahnke C, Olbrich H, Werner C, Raidt J, Wallmeier J, Pennekamp P, Dougherty GW, Hjeij R, Gee HY, Otto EA, Halbritter J, Chaki M, Diaz KA, Braun DA, Porath JD, et al. Mutations in SPAG1 cause primary ciliary dyskinesia associated with defective outer and inner dynein arms. *Am. J. Hum. Genet.* 2013; 93: 711–720.
37. Austin-Tse C, Halbritter J, Zariwala MA, Gilberti RM, Gee HY, Hellman N, Pathak N, Liu Y, Panizzi JR, Patel-King RS, Tritschler D, Bower R, O’Toole E, Porath JD, Hurd TW, Chaki M, Diaz KA, Kohl S, Lovric S, Hwang D-Y, Braun DA, Schueler M, Airik R, Otto EA, Leigh MW, Noone PG, Carson JL, Davis SD, Pittman JE, Ferkol TW, et al. Zebrafish ciliopathy screen plus human mutational analysis identifies C21orf59 and CCDC65 defects as causing primary ciliary dyskinesia. *Am. J. Hum. Genet.* 2013; 93: 672–686.

38. Castleman VH, Romio L, Chodhari R, Hirst RA, de Castro SCP, Parker KA, Ybot-Gonzalez P, Emes RD, Wilson SW, Wallis C, Johnson CA, Herrera RJ, Rutman A, Dixon M, Shoemark A, Bush A, Hogg C, Gardiner RM, Reish O, Greene NDE, O'Callaghan C, Purton S, Chung EMK, Mitchison HM. Mutations in radial spoke head protein genes RSPH9 and RSPH4A cause primary ciliary dyskinesia with central-microtubular-pair abnormalities. *Am. J. Hum. Genet.* 2009; 84: 197–209.
39. Kott E, Legendre M, Copin B, Papon J-F, Dastot-Le Moal F, Montantin G, Duquesnoy P, Piterboth W, Amram D, Bassinet L, Beucher J, Beydon N, Deneuve E, Houdouin V, Journal H, Just J, Nathan N, Tamalet A, Collot N, Jeanson L, Le Gouez M, Vallette B, Wojtek A-M, Epaud R, Coste A, Clement A, Housset B, Louis B, Escudier E, Amselem S. Loss-of-function mutations in RSPH1 cause primary ciliary dyskinesia with central-complex and radial-spoke defects. *Am. J. Hum. Genet.* 2013; 93: 561–570.
40. Onoufriadis A, Shoemark A, Schmidts M, Patel M, Jimenez G, Liu H, Thomas B, Dixon M, Hirst RA, Rutman A, Burgoyne T, Williams C, Scully J, Bolard F, Lafitte J-J, Beales PL, Hogg C, Yang P, Chung EMK, Emes RD, O'Callaghan C, Bouvagnet P, Mitchison HM. Targeted NGS gene panel identifies mutations in RSPH1 causing primary ciliary dyskinesia and a common mechanism for ciliary central pair agenesis due to radial spoke defects. *Hum. Mol. Genet.* 2014; 23: 3362–3374.
41. Jeanson L, Copin B, Papon J-F, Dastot-Le Moal F, Duquesnoy P, Montantin G, Cadranel J, Corvol H, Coste A, Désir J, Souayah A, Kott E, Collot N, Tissier S, Louis B, Tamalet A, de Blic J, Clement A, Escudier E, Amselem S, Legendre M. RSPH3 Mutations Cause Primary Ciliary Dyskinesia with Central-Complex Defects and a Near Absence of Radial Spokes. *Am. J. Hum. Genet.* 2015; 97: 153–162.
42. Ziętkiewicz E, Bukowy-Bieryłło Z, Voelkel K, Klimek B, Dmeńska H, Pogorzelski A, Sulikowska-Rowińska A, Rutkiewicz E, Witt M. Mutations in radial spoke head genes and ultrastructural cilia defects in East-European cohort of primary ciliary dyskinesia patients. *PLoS One* 2012; 7: e33667.
43. Olbrich H, Schmidts M, Werner C, Onoufriadis A, Loges NT, Raidt J, Banki NF, Shoemark A, Burgoyne T, Al Turki S, Hurles ME, Köhler G, Schroeder J, Nürnberg G,

- Nürnberg P, Chung EMK, Reinhardt R, Marthin JK, Nielsen KG, Mitchison HM, Omran H. Recessive HYDIN mutations cause primary ciliary dyskinesia without randomization of left-right body asymmetry. *Am. J. Hum. Genet.* 2012; 91: 672–684.
44. Merveille A-C, Davis EE, Becker-Heck A, Legendre M, Amirav I, Bataille G, Belmont J, Beydon N, Billen F, Clément A, Clercx C, Coste A, Crosbie R, de Blic J, Deleuze S, Duquesnoy P, Escalier D, Escudier E, Fliegauf M, Horvath J, Hill K, Jorissen M, Just J, Kispert A, Lathrop M, Loges NT, Marthin JK, Momozawa Y, Montantin G, Nielsen KG, et al. CCDC39 is required for assembly of inner dynein arms and the dynein regulatory complex and for normal ciliary motility in humans and dogs. *Nat. Genet.* 2011; 43: 72–78.
45. Becker-Heck A, Zohn IE, Okabe N, Pollock A, Lenhart KB, Sullivan-Brown J, McSheene J, Loges NT, Olbrich H, Haeffner K, Fliegauf M, Horvath J, Reinhardt R, Nielsen KG, Marthin JK, Baktai G, Anderson K V, Geisler R, Niswander L, Omran H, Burdine RD. The coiled-coil domain containing protein CCDC40 is essential for motile cilia function and left-right axis formation. *Nat. Genet.* 2011; 43: 79–84.
46. Antony D, Becker-Heck A, Zariwala MA, Schmidts M, Onoufriadis A, Forouhan M, Wilson R, Taylor-Cox T, Dewar A, Jackson C, Goggin P, Loges NT, Olbrich H, Jaspers M, Jorissen M, Leigh MW, Wolf WE, Daniels MLA, Noone PG, Ferkol TW, Sagel SD, Rosenfeld M, Rutman A, Dixit A, O’Callaghan C, Lucas JS, Hogg C, Scambler PJ, Emes RD, Chung EMK, et al. Mutations in CCDC39 and CCDC40 are the major cause of primary ciliary dyskinesia with axonemal disorganization and absent inner dynein arms. *Hum. Mutat.* 2013; 34: 462–472.
47. Oda T, Yanagisawa H, Kamiya R, Kikkawa M. A molecular ruler determines the repeat length in eukaryotic cilia and flagella. *Science (80-. ).* 2014; 346: 857–860.
48. Wirschell M, Olbrich H, Werner C, Tritschler D, Bower R, Sale WS, Loges NT, Pennekamp P, Lindberg S, Stenram U, Carlén B, Horak E, Köhler G, Nürnberg P, Nürnberg G, Porter ME, Omran H. The nexin-dynein regulatory complex subunit DRC1 is essential for motile cilia function in algae and humans. *Nat. Genet.* 2013; 45: 262–268.



49. Olbrich H, Cremers C, Loges NT, Werner C, Nielsen KG, Marthin JK, Philipsen M, Wallmeier J, Pennekamp P, Menchen T, Edelbusch C, Dougherty GW, Schwartz O, Thiele H, Altmüller J, Rommelmann F, Omran H. Loss-of-Function GAS8 Mutations Cause Primary Ciliary Dyskinesia and Disrupt the Nexin-Dynein Regulatory Complex. *Am. J. Hum. Genet.* 2015; 97: 546–554.
50. Amirav I, Wallmeier J, Loges NT, Menchen T, Pennekamp P, Mussaffi H, Abitbul R, Avital A, Bentur L, Dougherty GW, Nael E, Lavie M, Olbrich H, Werner C, Kintner C, Omran H. Systematic Analysis of CCNO Variants in a Defined Population: Implications for Clinical Phenotype and Differential Diagnosis. *Hum. Mutat.* 2016; 37: 396–405.
51. Wallmeier J, Al-Mutairi DA, Chen C-T, Loges NT, Pennekamp P, Menchen T, Ma L, Shamseldin HE, Olbrich H, Dougherty GW, Werner C, Alsabah BH, Köhler G, Jaspers M, Boon M, Griesse M, Schmitt-Grohé S, Zimmermann T, Koerner-Rettberg C, Horak E, Kintner C, Alkuraya FS, Omran H. Mutations in CCNO result in congenital mucociliary clearance disorder with reduced generation of multiple motile cilia. *Nat. Genet.* 2014; 46: 646–651.
52. Boon M, Wallmeier J, Ma L, Loges NT, Jaspers M, Olbrich H, Dougherty GW, Raidt J, Werner C, Amirav I, Hevroni A, Abitbul R, Avital A, Soferman R, Wessels M, O’Callaghan C, Chung EMK, Rutman A, Hirst R a, Moya E, Mitchison HM, Van Daele S, De Boeck K, Jorissen M, Kintner C, Cuppens H, Omran H. MCIDAS mutations result in a mucociliary clearance disorder with reduced generation of multiple motile cilia. *Nat. Commun.* 2014; 5: 4418.
53. Götz M, Stockinger L. Aplasia of respiratory tract cilia. *Lancet.* 1983 Jun 4;1(8336):1283.
54. Gordon RE, Kattan M. Absence of cilia and basal bodies with predominance of brush cells in the respiratory mucosa from a patient with immotile cilia syndrome. *Ultrastruct. Pathol.* 1984; 6: 45–49.
55. Budny B, Chen W, Omran H, Fliegau M, Tzschach A, Wisniewska M, Jensen LR, Raynaud M, Shoichet SA, Badura M, Lenzner S, Latos-Bielenska A, Ropers H-H. A novel X-linked recessive mental retardation syndrome comprising macrocephaly and ciliary

- dysfunction is allelic to oral-facial-digital type I syndrome. *Hum. Genet.* 2006; 120: 171–178.
56. Blanchon S, Legendre M, Copin B, Duquesnoy P, Montantin G, Kott E, Dastot F, Jeanson L, Cachanado M, Rousseau A, Papon JF, Beydon N, Brouard J, Crestani B, Deschildre A, Désir J, Dollfus H, Leheup B, Tamalet A, Thumerelle C, Vojtek A-M, Escalier D, Coste A, de Blic J, Clément A, Escudier E, Amselem S. Delineation of CCDC39/CCDC40 mutation spectrum and associated phenotypes in primary ciliary dyskinesia. *J. Med. Genet.* 2012; 49: 410–416.
  57. Marshall CR, Scherer SW, Zariwala MA, Lau L, Paton TA, Stockley T, Jobling RK, Ray PN, Knowles MR, Hall DA, Dell SD, Kim RH. Whole-Exome Sequencing and Targeted Copy Number Analysis in Primary Ciliary Dyskinesia. *G3 (Bethesda)*. 2015; 5: 1775–1781.
  58. Kim RH, A Hall D, Cutz E, Knowles MR, Nelligan KA, Nykamp K, Zariwala MA, Dell SD. The role of molecular genetic analysis in the diagnosis of primary ciliary dyskinesia. *Ann. Am. Thorac. Soc.* 2014; 11: 351–359.
  59. Shapiro AJ, Davis SD, Ferkol T, Dell SD, Rosenfeld M, Olivier KN, Sagel SD, Milla C, Zariwala MA, Wolf W, Carson JL, Hazucha MJ, Burns K, Robinson B, Knowles MR, Leigh MW. Laterality defects other than situs inversus totalis in primary ciliary dyskinesia: insights into situs ambiguus and heterotaxy. *Chest* 2014; 146: 1176–1186.
